1 Integrated ‘omic’ analyses provide evidence that a *Ca. Accumulibacter phosphatis*  
2 strain performs denitrification under micro-aerobic conditions

3 *Pamela Y. Camejo*<sup>1</sup>, *Ben O. Oyserman*<sup>1</sup>, *Katherine D. McMahon*<sup>1,2</sup>, *Daniel R. Noguera*<sup>1,\*</sup>

4  
5 <sup>1</sup>Department of Civil and Environmental Engineering, University of Wisconsin -  
6 Madison, Madison, WI, USA

7 <sup>2</sup>Department of Bacteriology, University of Wisconsin - Madison, Madison, WI, USA

8  
9 Email addresses:

10 [camejo.pamela@gmail.com](mailto:camejo.pamela@gmail.com)

11 [oyserman@wisc.edu](mailto:oyserman@wisc.edu)

12 [trina.mcmahon@wisc.edu](mailto:trina.mcmahon@wisc.edu)

13 [noguera@engr.wisc.edu](mailto:noguera@engr.wisc.edu)

14  
15 \* Corresponding author: Daniel R. Noguera, 1415 Engineering Drive, Madison, WI  
16 53706. Email: [noguera@engr.wisc.edu](mailto:noguera@engr.wisc.edu); Tel: 608-263-7783; Fax: 608-262-5199

17  
18  
19  
20  
21  
22  
23  
24  
25  
26  
27  
28  
29

30           **ABSTRACT**

31           The unique and complex metabolism of *Candidatus Accumulibacter phosphatis* has been  
32 used for decades for efficiently removing phosphorus during wastewater treatment in reactor  
33 configurations that expose the activated sludge to cycles of anaerobic and aerobic conditions.  
34 The ability of *Accumulibacter* to grow and remove phosphorus during cyclic anaerobic and  
35 anoxic conditions has also been investigated as a metabolism that could lead to simultaneous  
36 removal of nitrogen and phosphorus by a single organism. However, although phosphorus  
37 removal under cyclic anaerobic and anoxic conditions has been demonstrated, elucidating the  
38 role of *Accumulibacter* in this process has been challenging, since experimental research  
39 describes contradictory findings and none of the published *Accumulibacter* genomes show the  
40 existence of a complete pathway for denitrification. In this study, we use an integrated omics  
41 analysis to elucidate the physiology of an *Accumulibacter* strain enriched in a reactor operated  
42 under cyclic anaerobic and micro-aerobic conditions. The reactor's performance suggested the  
43 ability of the enriched *Accumulibacter* (clade IC) to simultaneously use oxygen and nitrate as  
44 electron acceptors under micro-aerobic conditions. A draft genome of this organism was  
45 assembled from metagenomic reads (hereafter referred to as *Accumulibacter* UW-LDO-IC) and  
46 used as a reference to examine transcript abundance throughout one reactor cycle. The genome  
47 of UW-LDO-IC revealed the presence of a full denitrification pathway. The observed patterns of  
48 transcript abundance showed evidence of co-regulation of the denitrifying genes along with a  
49 *cbb<sub>3</sub>* cytochrome, which is characterized as having high affinity for oxygen, thus supporting the  
50 hypothesis that UW-LDO-IC can simultaneously respire nitrate and oxygen. Furthermore, we  
51 identified an FNR-like binding motif upstream of the coregulated genes, suggesting  
52 transcriptional level regulation of the expression of both denitrifying and respiratory pathways in

53 Accumulibacter UW-LDO-IC. Taken together, the omics analysis provides strong evidence that  
54 Accumulibacter UW-LDO-IC simultaneously uses oxygen and nitrate as electron acceptors  
55 under micro-aerobic conditions.

## 56 **IMPORTANCE**

57 *Candidatus* Accumulibacter phosphatis is widely found in full-scale wastewater treatment  
58 plants, where it has been identified as the key organism for biological removal of phosphorus.  
59 Since aeration can account for 50% of the energy use during wastewater treatment, micro-  
60 aerobic conditions for wastewater treatment have emerged as a cost-effective alternative to  
61 conventional biological nutrient removal processes. Our study provides strong genomics-based  
62 evidence that Accumulibacter is not only the main organism contributing to phosphorus removal  
63 under micro-aerobic conditions, but also that this organism simultaneously respire nitrate and  
64 oxygen in this environment, consequently removing nitrogen and phosphorus from the  
65 wastewater. Such activity could be harnessed in innovative designs for cost-effective and energy-  
66 efficient optimization of wastewater treatment systems.

67

## 68 **INTRODUCTION**

69 *Candidatus* Accumulibacter phosphatis (hereafter referred to as Accumulibacter) is the main  
70 microorganism removing phosphorus (P) in many wastewater treatment plants performing  
71 enhanced biological phosphorus removal (EBPR) (1-4). This uncultured polyphosphate  
72 accumulating organism (PAO) fosters a unique and complex metabolism that responds to  
73 changes in the availability of carbon, phosphorus, and oxygen. Under anaerobic conditions,  
74 Accumulibacter takes up volatile fatty acids (VFA) present in the wastewater and stores the  
75 carbon from these simple molecules intracellularly as poly- $\beta$ -hydroxyalkanoate (PHA), while

76 hydrolyzing intracellular polyphosphate (polyP) to phosphate, which is then released from the  
77 cell to the liquid phase (5). The subsequent addition of oxygen into the bulk liquid triggers the  
78 use of stored PHA molecules to generate energy for growth, concomitant with the uptake of  
79 phosphate from the medium to form polyphosphate, eventually leading to the efficient removal  
80 of P from the wastewater.

81 Analysis of the *Accumulibacter* lineage has led to the discovery of multiple genome variants.  
82 Using the polyphosphate kinase (*ppkI*) gene as a phylogenetic marker, *Accumulibacter* variants  
83 have been subdivided into two types and 14 different clades (types IA-E and IIA-I) (6-9). This  
84 genomic divergence may be responsible for observed phenotypic variations of EBPR under  
85 different environmental conditions (10-14). Among these differences, *Accumulibacter*'s fitness  
86 for anoxic respiration is a topic of much debate since published studies have presented  
87 contradictory findings on whether *Accumulibacter* can respire nitrogenous compounds. While  
88 several studies predicted that strains belonging to *Accumulibacter* type I could use nitrite and/or  
89 nitrate as electron acceptors (10, 15-17), other studies concluded that type I is not capable of  
90 anoxic nitrate respiration (18, 19). These studies have used different methods for clade  
91 classification, with some of them describing *Accumulibacter* at the type level and others at the  
92 clade level, as defined based on *ppkI* phylogeny (6). Therefore, it remains uncertain whether  
93 individual clades exhibit a consensus phenotype regarding respiration of nitrogenous  
94 compounds. It is also possible that differences in the metabolic potential of *Accumulibacter* may  
95 vary among strains within the same clade. Uncovering the metabolic traits characterizing distinct  
96 *Accumulibacter* populations will provide a better understanding of the ecological role of each of  
97 these clades/populations and the biotechnological potential of this lineage in novel nutrient  
98 removal processes.

99 In a previous study, we characterized the clade-level population of *Accumulibacter* in a  
100 biological nutrient removal reactor operated under cyclic anaerobic and micro-aerobic conditions  
101 and evaluated the ability of the enriched population to use multiple electron acceptors (8).  
102 Experimental evidence from this study led to the hypothesis that a particular clade of  
103 *Accumulibacter* (clade IC) could use oxygen and nitrate as electron acceptors (8) when the  
104 system is operated with cyclic anaerobic and micro-aerobic conditions. In this study, we use a  
105 combination of omics techniques to further investigate the genomic potential, gene expression,  
106 and transcriptional regulation of an enriched clade IC *Accumulibacter* population to further  
107 elucidate the metabolic capabilities of this species-like group. This analysis provides strong  
108 evidence that the enriched *Accumulibacter* clade IC population simultaneously uses oxygen and  
109 nitrate as electron acceptors under micro-aerobic conditions, and therefore, that this organism  
110 contributes to the simultaneous removal of nitrogen and phosphorus from wastewater.

111

## 112 **MATERIAL AND METHODS**

### 113 **Operation of Lab-Scale Sequencing Batch Reactor**

114 A laboratory-scale sequencing batch reactor (SBR) was used in this study. The reactor was  
115 originally inoculated with activated sludge obtained from the Nine Springs wastewater treatment  
116 plant in Madison, WI, which uses a variation of the University of Cape Town (UCT) process  
117 designed to achieve biological P removal without nitrate removal (20) and operates with high  
118 aeration rates (21). Details of the lab-scale operation under cyclic anaerobic and micro-aerobic  
119 conditions are provided in reference (8). Briefly, the SBR had a 2-liter working volume and was  
120 fed with synthetic wastewater containing acetate (500 mgCOD/L) as the sole carbon source (C:P  
121 molar ratio of 20). The synthetic wastewater was dispensed as two separate media; Media A

122 contained the acetate and phosphate, whereas Media B supplied the ammonia (8). The reactor  
123 was operated under alternating anaerobic and low oxygen 8-h cycles. Each cycle consisted of 1.5  
124 h anaerobic, 5.5 h micro-aerobic, 50 min settling and 10 min decanting. During the micro-  
125 aerobic stage, an on/off control system was used to limit the amount of oxygen pumped to the  
126 reactor (0.02 L/min) and to maintain micro-aerobic conditions in the mixed liquor (DO set point  
127 = 0.2 mg/L). The hydraulic retention time (HRT) and solids retention time (SRT) were 24 h and  
128 80 days, respectively. The pH in the system was controlled to be between 7.0 and 7.5.

### 129 **Sample Collection and Analytical Tests**

130 To monitor reactor performance, mixed liquor and effluent samples were collected, filtered  
131 through a membrane filter (0.45  $\mu\text{m}$ ; Whatman, Maidstone, UK) and analyzed for acetate,  $\text{PO}_4^{3-}$ -  
132 P,  $\text{NH}_3 + \text{NH}_4^+$ -N,  $\text{NO}_3^-$ -N, and  $\text{NO}_2^-$ -N. The concentrations of  $\text{PO}_4^{3-}$ -P were determined  
133 according to Standard Methods (22). Total ammonia ( $\text{NH}_3 + \text{NH}_4^+$ ) concentrations were  
134 analyzed using the salicylate method (Method 10031, Hach Company, Loveland, CO). Acetate,  
135 nitrite and nitrate were measured using high-pressure liquid chromatography as previously  
136 described (8).

137 For 16S rRNA-based tag sequencing and metagenomic analyses, biomass samples from  
138 the reactors were collected weekly and stored at  $-80^\circ\text{C}$  until DNA extraction was performed.  
139 DNA was extracted using UltraClean® Soil DNA Isolation Kit (MoBIO Laboratories, Carlsbad,  
140 CA). Extracted DNA was quantified using a NanoDrop spectrophotometer (Thermo Fisher  
141 Scientific, Waltham, MA) and stored at  $-80^\circ\text{C}$ .

142 For transcriptomic analyses, biomass samples were collected across a single reactor cycle  
143 to capture key transition points in the EBPR cycle (Fig. 1). Samples (2 ml) were collected in  
144 microcentrifuge tubes, centrifuged, supernatant removed and cell pellets flash frozen in dry ice

145 and ethanol bath within 3 min of collection. RNA was extracted from the samples using a  
146 RNeasy kit (Qiagen, Valencia, CA, USA) with a DNase digestion step. RNA integrity and DNA  
147 contamination were assessed using the Agilent 2100 Bioanalyzer (Agilent Technologies, Palo  
148 Alto, CA, USA).

### 149 **Ribosomal RNA gene-based Tag sequencing**

150 The composition of the microbial community in the reactor was determined via the  
151 analysis of high-throughput sequencing of 16S rRNA gene fragments. The hyper-variable V3-  
152 V4 regions of the bacterial 16S rRNA gene were amplified using the primers 515f/806r (23) as  
153 described in reference (8). The sequencing data is available under BioProject PRJNA482250.  
154 Briefly, PCR products were generated using the Ex Taq kit (Takara); cycling conditions involved  
155 an initial 5 min denaturing step at 95°C, followed by 35 cycles at 95°C for 45 s, 50°C for 60 s,  
156 72°C for 90 s, and a final elongation step at 72°C for 10 min. Amplicons were visualized on an  
157 agarose gel to confirm product sizes. Purified amplicons were pooled in equimolar quantities and  
158 sequenced on an Illumina Miseq benchtop sequencer using pair-end 250 bp kits at the Cincinnati  
159 Children's Hospital DNA Core facility.

160 Paired-end reads obtained were merged, aligned, filtered and binned into operational  
161 taxonomic units (OTU) with 97% identity using the QIIME pipeline (24). Chimeric sequences  
162 were removed using UCHIME (25). The most representative sequences from each OTU were  
163 taxonomically classified using the MIDas-DK database (26).

### 164 **Quantitative polymerase chain reaction (qPCR)**

165 Quantification of each *Accumulibacter* clade was carried out by qPCR using a set of  
166 clade-specific primers targeting the polyphosphate kinase (*ppk1*) gene (8). All qPCR reactions  
167 were run in a LightCycler 480 system (Roche applied Science, Indianapolis, IN). Each reaction

168 volume was 20  $\mu$ L and contained 10  $\mu$ L iQ<sup>TM</sup> SYBR<sup>®</sup> Green Supermix (BioRAD Laboratories,  
169 Hercules, CA), 0.8  $\mu$ L each of 10  $\mu$ M forward and reverse primer, 4.4  $\mu$ L nuclease free water and  
170 4  $\mu$ L of sample. Templates for qPCR were obtained from clone collections or gene synthesis  
171 (IDT, USA). In all cases, ten-fold serial dilutions of each template (ranging from  $10^1$  to  $10^7$   
172 copies per reaction) were used to generate qPCR calibration curves. All samples were processed  
173 in triplicate and each reaction plate contained non-template controls.

#### 174 **Metagenome sequencing, assembly and binning**

175 Samples from days 522 and 784 were selected for metagenomic analysis. Illumina TruSeq  
176 DNA PCR free libraries were prepared for DNA extracts according to the manufacturer's  
177 protocol and paired-end sequenced on either the Illumina HiSeq 2000 platform (v4 chemistry, 2  
178  $\times$  150  $\square$ bp; 522-day sample), or the Illumina MiSeq platform (v3 chemistry, 2  $\times$  250  $\square$ bp; 784-  
179 day sample). A sample from day 522 was also sequenced on MinION (Oxford Nanopore  
180 Technologies, Oxford, UK), according to the Oxford Nanopore Genomic DNA Sequencing  
181 protocol (SQK-MAP003). The MinION flowcell was run for 48-h using the MinION control  
182 software, MinKNOW (version 47.3) and online base-calling was performed by the software  
183 Metrichor (version 2.23). Raw reads have been submitted to NCBI and are accessible under the  
184 BioProject identifier PRJNA322674.

185 Illumina unmerged reads were quality-trimmed and filtered with Sickle  
186 (<https://github.com/ucdavis-bioinformatics/sickle.git>), using a minimum phred score of 20 and a  
187 minimum length of 50 bp. Metagenomic reads from day 522 were assembled using the  
188 metaSPAdes pipeline of SPAdes 3.9.0 (27) and individual genome bins were extracted from the  
189 metagenome assembly using MaxBin (28). Genome completeness and redundancy was estimated  
190 using CHECKM 0.7.1 (29). Taxonomic identity of the bins was assigned using PhyloSift v 1.0.1



191 (30) and the script ‘parse\_phylosift\_sts.py’ available at  
192 [https://github.com/sstevens2/sstevens\\_pubscrip/blob/master/parse\\_phylosift\\_sts.py](https://github.com/sstevens2/sstevens_pubscrip/blob/master/parse_phylosift_sts.py) (with options  
193 *-co\_prob 0.7* and *-co\_perc 0.7*). Bin information is summarized in Table S1.

194 Two putative *Accumulibacter* bins (bin.046 and bin.097.4 in Table S1) were identified.  
195 The bin with the highest completeness (bin.046; hereafter referred to as UW-LDO-IC) was  
196 selected for further analysis and subjected to further processing to improve its quality. Redundant  
197 scaffolds were manually removed based on tetra-nucleotide frequency and differential coverage,  
198 using metagenomic reads from days 522 and 784 and following the anvi’o workflow described in  
199 A. M. Eren et al. (31). Further scaffolding was performed on UW-LDO-IC using Nanopore  
200 long-reads and the LINKS algorithm (32). Gapcloser  
201 (<https://sourceforge.net/projects/soapdenovo2/files/GapCloser/>) was used for additional gap  
202 filling. Table S2 displays quality metrics of the *Accumulibacter* draft genome after each of the  
203 steps previously described. The metagenomic assembly and final *Accumulibacter* bin was  
204 annotated using MetaPathways v 2.0 (33) and can be found under the GenBank accession  
205 number QPGA00000000.

## 206 **Average Nucleotide Identity (ANI)**

207 Pair-wise ANI values of *Accumulibacter* genomes were obtained using the ANIm method  
208 (34) and implemented in the Python script ‘calculate\_ani.py’ available at  
209 [https://github.com/ctSkenneron/scriptShed/blob/master/calculate\\_ani.py](https://github.com/ctSkenneron/scriptShed/blob/master/calculate_ani.py).

## 210 **Phylogenetic Analyses**

211 The phylogeny of *Accumulibacter* UW-LDO-IC was assessed by constructing a  
212 phylogenetic tree using a concatenated alignment of marker genes. Published *Accumulibacter*

213 draft and complete genomes were included in the analysis. First, PhyloSift was used to extract a  
214 set of 38 marker genes from each genome. Then, the extracted marker protein sequences were  
215 concatenated into a continuous alignment to construct a maximum-likelihood (ML) tree, using  
216 RAxML v 7.2.8 (35). RAxML generated 100 rapid bootstrap replicates followed by a search for  
217 the best-scoring ML tree.

218 For phylogenetic analyses of the polyphosphate kinase 1 (*ppk1*), nitrate reductase alpha  
219 subunit (*narG*), nitrite reductase (*nirS*), nitric oxide reductase (*norZ*), and nitrous oxide reductase  
220 (*nosZ*) genes, nucleotide datasets were downloaded from the NCBI GenBank database (36).  
221 Alignments were performed using the ‘AlignSeqs’ command in the DECIPHER “R” package  
222 (37). Phylogenetic trees were calculated using neighbor-joining criterion with 1,000 bootstrap  
223 tests for every node and the trees were visualized with the assistance of FigTree v1.4  
224 (<http://tree.bio.ed.ac.uk>).

### 225 **RNA sequencing, filtering and mapping**

226 Six biomass samples from within a reactor cycle on operational day 522 (Fig. 1) were  
227 collected and immediately processed to determine transcript abundance. RNA was extracted  
228 from the samples using a RNeasy kit (Qiagen, Valencia, CA, USA) with a DNase digestion step.  
229 RNA integrity and DNA contamination were assessed using the Agilent 2100 Bioanalyzer  
230 (Agilent Technologies, Palo Alto, CA, USA). Ribosomal RNA (rRNA) was removed from 1 µg  
231 of total RNA using Ribo-Zero rRNA Removal Kit (Bacteria) (Epicentre, Madison, WI, USA).  
232 Libraries were generated using the Truseq Stranded mRNA sample preparation kit (Illumina, San  
233 Diego, CA, USA), according to the manufacturer’s protocol. The libraries were quantified using  
234 KAPA Biosystem’s next-generation sequencing library quantitative PCR kit and run on a Roche  
235 LightCycler 480 realtime PCR instrument. The quantified libraries were then prepared for

236 sequencing on the Illumina HiSeq 2000 sequencing platform utilizing a TruSeq paired-end  
237 cluster kit, v3, and Illumina's cBot instrument to generate a clustered flowcell for sequencing.  
238 Sequencing of the flowcell was performed on the Illumina HiSeq 2000 sequencer using a TruSeq  
239 SBS sequencing kit 200 cycles, v3, following a 2×150 indexed run recipe. Sequence data were  
240 deposited at IMG/M under Taxon Object IDs 3300004259-3300004260 and 3300004621-  
241 3300004624.

242 RNA reads were quality filtered and trimmed with Sickle and forward and reverse reads were  
243 merged using FLASH (v. 1.2.11) (38). Ribosomal RNA sequences were removed with  
244 SortMeRNA using six built in databases for bacterial, archaeal and eukaryotic small and large  
245 subunits (39). Reads that passed filtering were then mapped to the metagenomic assembly and to  
246 the complete and draft genomes using the BMap suite (40) with default parameters,  
247 respectively. Read counts were then calculated using HTseq with the 'intersection strict'  
248 parameter (41). Read counts were normalized by total reads in the sequencing run, the number of  
249 reads that remained after rRNA filtering, and the fraction of total reads that aligned to the  
250 assembly and genomes (Table S3) in each sample. Number of reads mapping to each gene were  
251 then converted to log<sub>2</sub> reads per kilobase per million (RPKM (42)).

## 252 **Primer design**

253 PCR primer sets targeting the *Accumulibacter* UW-LDO-IC's genes *nirS*, *narG*, *norZ*, *nosZ*,  
254 the *ccoN* subunit of *cbb3* and the *ctaD* subunit of *caa3* cytochrome oxidases, were designed to  
255 quantify expression of these genes in cDNA samples from the reactor. For comparison, primers  
256 for the *rpoN* gene were also designed (Table S4). For primer design, genes from UW-LDO-IC  
257 and other published *Accumulibacter* genomes were aligned with homologs from bacteria that  
258 share relatively high DNA sequence identity with *Accumulibacter*. The list of aligned gene

259 sequences was then submitted to DECIPHER's Design Primers web tool (43) using the  
260 following parameters: primers length ranging from 17-26 nucleotides with up to 2 permutations  
261 and PCR product amplicon length between 75-500 bp.

262 PCR amplification of UW-LDO-IC gene fragments was carried out on extracted genomic  
263 DNA from the lab-scale SBR, in a 25  $\mu$ L reaction volume with 400 nM of each forward and  
264 reverse primer. The PCR program consisted of an initial 10-min denaturation step at 95°C,  
265 followed by 30 cycles of 95°C for 30 s, 64°C for 30 s, and 72°C for 30 s, and then a final  
266 extension at 72°C for 5 min. The presence and sizes of the amplification products were  
267 determined by agarose (2%) gel electrophoresis of the reaction product. The amplified fragments  
268 were then purified, cloned using a TOPO TA cloning kit (Invitrogen, CA) according to the  
269 manufacturer's instructions. Fragments were single-pass Sanger sequenced, and the sequences  
270 were aligned to *Accumulibacter* UW-LDO-IC to confirm specificity. In all cases, PCR fragment  
271 sequences aligned to the corresponding gene in UW-LDO-IC with a percent of identity > 97%,  
272 whereas the identity percentage with other *Accumulibacter* genomes was < 95%. The sequences  
273 have been deposited in GenBank under BioProject PRJNA482254.

#### 274 **Quantitative real-time PCR**

275 Complementary DNA (cDNA) was generated from 500 ng of total RNA, primed by random  
276 hexamers (SuperScript II first-strand synthesis system, Invitrogen, Carlsbad, CA, USA). The  
277 reaction was terminated by incubation at 85°C for 5 min and RNase H treatment was performed  
278 to degrade RNA in RNA:DNA hybrids. Subsequently, 4  $\mu$ L of 10x diluted cDNA was applied as  
279 the template in qPCR. All quantifications were performed in triplicate. The qPCR was conducted  
280 on a LightCycler 480 (Roche, Switzerland) using iQ SYBR Green Supermix (Bio-Rad) with a  
281 total reaction volume of 20  $\mu$ L. All qPCR programs consisted of an initial 3 min denaturation at

282 95°C, followed by 45 cycles of denaturing at 95°C for 30 s, 64°C for 30 s, and 72°C for 30 s.  
283 RNA samples without reverse transcription were used as no RT (reverse transcription) controls  
284 to evaluate DNA contamination for all primers tested. The relative fold change of target gene  
285 expression between samples was quantified using *Accumulibacter rpoN* as a reference gene.

286

### 287 **Operons and upstream motif identification**

288 *De novo* motif detection analysis was conducted on the intergenic regions upstream of the  
289 *nar*, *nir*, *nor*, *nos*, *caa3* and *cbb3* operons of *Accumulibacter* UW-LDO-IC using MEME (44).  
290 FNR-motif sites were further identified in both strands of other *Accumulibacter* genomes using  
291 the FIMO tool (45) (p-values <  $1 \times 10^{-5}$ ). Search was limited to the promoter region, represented  
292 by the 300 bp intergenic region upstream of the transcriptional start site, of all protein-coding  
293 sequences annotated with MetaPathways (33).

294 Putative operons were determined using the same set of criteria as in reference (46). That is,  
295 each operon enclosed adjacent genes with the same orientation, co-expressed with a minimum  
296 Pearson correlation coefficient of 0.7, and an intergenic region between genes of 1000 base pairs  
297 or less.

## 298 **RESULTS AND DISCUSSION**

### 299 **Characterization of reactor operation and *Accumulibacter* community structure**

300 A nutrient profile of one reactor's cycle from the date samples were collected for  
301 transcriptomics (day 522) is shown in Fig. 1. Acetate was slowly added to the reactor during the  
302 first 32 minutes of the anaerobic phase, with no accumulation observed, as it was rapidly  
303 consumed. P release to the mixed-liquor was observed during the period of acetate uptake.  
304 During the anaerobic stage, ammonia-containing media was supplied during the first 16 min of

305 the anaerobic stage and the ammonia accumulated in the reactor. In the micro-aerobic phase,  
306 when measured DO was about 0.02 mg/L, P was taken up by cells. Simultaneously, nitrification  
307 occurred during the first 3 hours of aeration, without  $\text{NO}_2^-$  or  $\text{NO}_3^-$  accumulation, indicating  
308 simultaneous nitrification and denitrification in the reactor. After all the substrates that exert  
309 oxygen demand were depleted, oxygen increased and fluctuated around the 0.2 mg/L set point.  
310 These observations are consistent with an efficient EBPR process under cyclic anaerobic and  
311 micro-aerobic conditions, as discussed elsewhere (8).

312 Samples collected on the same day for 16S rRNA amplicon sequencing indicated that  
313 *Accumulibacter* was the most abundant bacterium in the reactor, accounting for 34% of the total  
314 number of reads (Table S5). Members of the *Competibacteraceae* family (16%) and the  
315 *Lewinella* genus (11%) were also abundant. The diversity within the *Accumulibacter* lineage  
316 was assessed by qPCR (Table S6). In these samples the *Accumulibacter* members were  
317 dominated by Clade IC, which accounted for 74% of the total, followed by Clade IID (14%) and  
318 IIA (9%). As described before (8), clade IC predominated in the reactor during at least 300 days  
319 of operation, with abundances greater than 87% of total *Accumulibacter*, and batch tests  
320 suggested its ability to use oxygen, nitrite, and nitrate as electron acceptors (8). Clade IC has  
321 also been described as the dominant *Accumulibacter* clade in a reactor operated under  
322 anaerobic/anoxic/oxic conditions (18). However, contrary to our findings, batch tests suggested  
323 that this strain was not capable of using nitrate as external electron acceptor for anoxic P-  
324 removal. This inconsistency among denitrifying capabilities could be the result of genetic  
325 variations that are not captured with the current *ppk1*-based clade definitions.

## 326 **Assembling a draft genome of *Accumulibacter* clade IC**

327 All existing metagenome assembled genomes (MAGs) of *Accumulibacter* have been  
328 obtained from bioreactors operated under conventional anaerobic/aerobic cycles that use  
329 abundant aeration (47-50). To date, only one genome of *Accumulibacter* has been closed (clade  
330 IIA strain UW-1), while draft genomes from 5 different clades (clade IA, IB, IIA, IIC and IIF)  
331 have been reconstructed from metagenomic data. Since the SBR reactor operated with  
332 anaerobic/micro-aerobic cycles enriched for a less common clade of *Accumulibacter*, we  
333 performed a metagenomic assessment of the microbial community in the reactor. The whole-  
334 community DNA of two samples from the reactor were sequenced using two different  
335 technologies: Illumina and Oxford Nanopore. Short Illumina reads were initially assembled and  
336 binned into 136 different bacterial draft genomes (Table S1). One of these bins was classified as  
337 *Accumulibacter* (bin.046) and characterized by its high completeness (94.8%) and relatively high  
338 redundancy (28.9%), likely due to the presence of redundant gene markers from other  
339 *Accumulibacter* strains. The presence of another incomplete bin also classified as  
340 *Accumulibacter* (bin.097.4; 26.0% completeness) further support the idea of other  
341 *Accumulibacter* strains present at lower concentrations, in agreement with the assessment of  
342 diversity based on the *ppk1* gene (Table S6). To obtain a higher-quality draft genome of the  
343 dominant *Accumulibacter* strain, the differential coverage of two metagenomic samples was used  
344 to remove contaminant contigs, reducing the redundancy level to 0.84% of marker genes.  
345 Finally, Nanopore sequencing data was used for further scaffolding; gaps were filled using the  
346 GapCloser tool. The resulting near-complete draft genome, termed *Accumulibacter* sp. UW-  
347 LDO-IC, has 4.7 Mbp in total with average GC content of 62.5% (Table S2) and encoded 95.2%  
348 of marker genes with 0.68% redundancy.

349 A phylogenetic tree constructed from the *ppk1* gene encoded in UW-LDO-IC, other  
350 Accumulibacter genomes and sequences available at NCBI, were used to classify UW-LDO-IC  
351 into one of the 14 Accumulibacter clades described to date. According to the phylogenetic tree  
352 topology of the *ppk1* gene (Fig. 2A), UW-LDO-IC's *ppk1* clustered with sequences previously  
353 classified as clade IC, and therefore, the draft genome assembled herein would belong to this  
354 clade. With more Accumulibacter draft genomes becoming available in recent years, the tree  
355 topology also suggests that Accumulibacter BA-92 (49), a draft genome initially classified as  
356 clade IC may be better classified as belonging to clade IB along with the draft genome HKU-1  
357 (48). To further evaluate this potential misclassification, a phylogenetic tree of a concatenated  
358 protein alignment of 38 universally distributed single-copy marker genes (51) was constructed  
359 (Fig. 2B). This tree topology supports the classification of UW-LDO-IC as belonging to Type I,  
360 but separate from Accumulibacter BA-92 and HKU-1. Thus, we propose that UW-LDO-IC be  
361 classified as the only draft genome representing clade IC, and Accumulibacter BA-92 and HKU-  
362 1 be classified in clade IB, along with Accumulibacter UBA2783 (52).

363 Average nucleotide sequence identity (ANI) between UW-LDO-IC and formerly published  
364 Accumulibacter genomes was used to confirm the phylogenetic analysis, as this method has been  
365 shown to correlate well with previously defined species boundaries (53, 54). The calculated ANI  
366 and alignment fraction for the Accumulibacter genomes showed that UW-LDO-IC shares only  
367 88.7 and 88.3% identity and 67.2 and 60.2% alignment with Accumulibacter HKU-1 (Clade IB)  
368 and BA-92 (Clade IB), respectively (Fig. S1). The low ANI and low alignment, as well as the  
369 concatenated markers phylogeny, indicates that Accumulibacter UW-LDO-IC has significant  
370 differences with other Accumulibacter genomes, none of which have been retrieved from BNR  
371 microbiomes adapted to minimal aeration.



372 **Denitrification potential of Accumulibacter UW-LDO-IC**

373 A comparison of the genetic inventory involved in anoxic respiration revealed differences  
374 between UW-LDO-IC and previously published Accumulibacter genomes (Table 1 and S7).  
375 Among the differences found is that UW-LDO-IC encodes a full denitrification pathway, which  
376 involves a membrane bound nitrate reductase of the NarG type (*narGHJI* operon), as well as a  
377 nitrate/nitrite transporter homologous to the *narK* gene, a periplasmic cytochrome *cd<sub>1</sub>* nitrite  
378 reductase NirS and the proteins involved in heme d<sub>1</sub> biosynthesis (*nirMCFDLGHJN*), a quinol-  
379 dependent nitric oxide reductase *norZ* and a nitrous oxide reductase Nos (*nosZDFYL*) (Table 1).  
380 The genetic context of these genes was compared to other Accumulibacter genomes (Fig. S2).  
381 The position of denitrifying genes within the genome varied among different clades. Overall,  
382 genes flanking the *nar* operon, *nirS-2* and *nosZ* genes were the same in all Accumulibacter  
383 clades where these genes were identified, including UW-LDO-IC. Unlike clade IIC or IB, *nirS-1*  
384 of UW-LDO-IC was not positioned next to the *nar* or *nor* genes, but the genomic context of  
385 *nirS-1* in UW-LDO-IC differed from any Accumulibacter genome. Since *nirS-1* from UW-LDO-  
386 IC presented high identity with Accumulibacter HKU-1 and BA-92 (91%), this difference in the  
387 genome context might be caused by lateral gene transfer. The presence of transposase genes next  
388 to *uspA* in BA-93 (a flanking gene of *nirS-1* in UW-LDO-IC (Fig. S2)) supports this hypothesis.

389 An alignment of full-length sequences of subunits *narG*, *nirS*, *norZ* and *nosZ*, which  
390 contain the active sites in the corresponding enzymes, was used to evaluate the phylogenetic  
391 associations of these genes (Fig. S3-S6). This analysis revealed that all UW-LDO-IC genes  
392 involved in denitrification were closely related to other members of the Accumulibacter genus,  
393 ruling out possible contig contamination from other denitrifying bacteria during binning.  
394 Phylogenetic differentiation between genes belonging to type I and II of Accumulibacter was

395 observed, where genes belonging to UW-LDO-IC clustered with other genes from type I  
396 genomes. In the case of *narG*, which has only been identified in genomes from clade IIC, UW-  
397 LDO-IC clustered separately from the Clade II genes (Fig. S3).

398 Denitrifying genes encoded in *Accumulibacter* genomes were phylogenetically related to  
399 different taxonomic groups. Genes encoding the NarG proteins seem to have derived from other  
400 *Betaproteobacteria*. Interestingly, these genes exhibit phylogenetic relation with *narG* from  
401 different bacterial families (*Comamonadaceae*, *Pseudomonaceae*, *Burkholderaceae* and  
402 *Rhodocyclaceae*), indicating a similar origin (Fig. S3). The close relationship of  
403 *Accumulibacter*'s *narG* with the plasmid-encoded gene in *Burkholderia phymatum* suggests  
404 potential mobility of this gene across genera.

405 Multiple copies of *nirS* are present in the majority of *Accumulibacter* genomes, including  
406 UW-LDO-IC (Fig. S4). The phylogenetic analysis of sequences encoding this gene indicates two  
407 main clusters of *nirS* including sequences from both *Accumulibacter* and other members of the  
408 *Rhodocyclaceae* family, with one of these clusters, harboring the *nirS-2* and *nirS-3* genes of UW-  
409 LDO-IC, being closely related to sequences from the *Pseudomonas* genus. Interestingly, no other  
410 *Rhodocyclaceae* member encoded a quinol-dependent nitric oxide reductase (*norZ*), since in  
411 these species, nitric oxide reduction requires the activity of a cytochrome *bc*-type complex  
412 (*norBC*). *Accumulibacter*'s *norZ* was instead phylogenetically most closely related to  
413 *Polaromonas*, another member of the *Comamonadaceae* family (Fig. S5). Finally, the closest  
414 sequences to *Accumulibacter*'s *nosZ* gene, belonged to the *Dechloromonas* (*Rhodocyclaceae*  
415 member) (Fig. S6). These findings are in agreement with a recent ancestral genome  
416 reconstruction and evolutionary analysis of the *Accumulibacter* lineage, which found that the  
417 denitrification machinery was not present in the last common ancestor of *Accumulibacter* and

418 that one of the most abundant source of horizontally transferred genes are the *Burkholderiales*,  
419 including many from *Comamonadaceae* (see Supplementary Table 6 in reference (55)). Overall,  
420 these results suggest that part of the denitrification machinery of *Accumulibacter* was laterally  
421 transferred from other microorganisms commonly found in activated sludge.

422 Only incomplete denitrification pathways, with the potential of reducing nitrite to nitrogen  
423 gas (*Accumulibacter* UW-1, UBA6658, UBA2783, UW-2, BA-92 and BA-93) and nitrate to  
424 nitric oxide (*Accumulibacter* SK-01, SK-02, BA-91, UBA5574 and HKU-2), were identified in  
425 other *Accumulibacter* genomes (Table 1). Furthermore, evidence for a periplasmic nitrate  
426 reductase Nap enzyme was not found in UW-LDO-IC but is present in other *Accumulibacter*  
427 genomes (Table 1). Although it has been hypothesized that Nap could be responsible for the  
428 nitrate reduction step in some *Accumulibacter* strains (49), due to the functional diversity of this  
429 enzyme, involved in denitrification, nitrate reduction to ammonia, maintenance of cellular  
430 oxidation–reduction potential and nitrate scavenging, the presence of a *nap* homolog in an  
431 organism’s genome cannot necessarily be linked to nitrate respiration (56). For instance, despite  
432 the existence of a *nap* operon within the *Accumulibacter* UW-IA (clade IIA) genome (Table 1  
433 and S7), J. J. Flowers et al. (10) demonstrated through batch denitrification assays, that this strain  
434 could not use nitrate as a terminal electron acceptor. Therefore, UW-LDO-IC would be the first  
435 *Accumulibacter* genome found to encode a full denitrifying machinery, containing genes directly  
436 involved in the reduction of nitrate to nitrogen gas, settling a long-running debate in the research  
437 community about whether *Accumulibacter* can achieve complete nitrate reduction to nitrogen  
438 gas while cycling polyphosphate (10, 15, 17, 57).

439 **Aerobic respiration potential of *Accumulibacter* UW-LDO-IC**

440 The presence of known terminal oxidases, which catalyze oxygen reduction to water  
441 during the final step of the electron transport chain (58), was examined in the available  
442 *Accumulibacter* genomes. Three known terminal oxidases were annotated in all genomes of  
443 *Accumulibacter*: cytochrome *aa*<sub>3</sub> (encoded by the *ctaDCE*), *ba*<sub>3</sub> (encoded by the subunits *cbaA*  
444 *and cbaB*) and *cbb*<sub>3</sub> (encoded by operon *ccoNOQP*) oxidases, which accept electrons from  
445 cytochrome c and transfer them in reactions involved in oxygen reduction (Table 2 and S8). The  
446 *aa*<sub>3</sub>-type oxidases have low affinity for oxygen and usually play a dominant role under high  
447 oxygen conditions (59-61). Phylogeny of the first subunit of this enzyme (Fig. S7) shows  
448 marked differentiation of the *Accumulibacter* lineage from other *Rhodocyclaceae* organisms,  
449 although some genomes of *Accumulibacter*, including UW-I (clade IIA), clustered closely to  
450 *Dechloromonas*. All genomes classified as clade IIF lacked this subunit (Table 2), and thus,  
451 members of this group might rely on other cytochrome c oxidases for aerobic respiration.

452 On the other hand, *cbb*<sub>3</sub> oxidases are known to have very high affinity for oxygen and to be  
453 induced under low oxygen conditions in many bacteria (62-66). This enzyme is widespread in  
454 the *Accumulibacter* lineage, since 18 out of the 21 genomes analyzed herein harbored the *cco*  
455 operon encoding the subunits of this enzyme (Table 2). These results indicate that the ability to  
456 survive in low-oxygen concentrations is common across *Accumulibacter* strains and would  
457 explain why lowering oxygen concentration does not seem to negatively affect EBPR (8, 21, 67).  
458 The phylogenetic analysis of the first subunit of this enzyme, *ccoN*, shows conservation of this  
459 trait among members of the *Rhodocyclaceae* family (Fig. S8).

460 Lastly, *ba*<sub>3</sub>-type cytochrome oxidase has been mostly studied in the extremophile  
461 bacterium *Thermus thermophilus*, where it is usually expressed under oxygen limiting conditions  
462 (68), but little is known about its role in other organisms. In *Accumulibacter* this enzyme is

463 present in all clades (Table 2) and its phylogeny reveals that it could be derived from non-  
464 *Rhodocyclaceae* members (Fig. S9).

#### 465 **Changes in transcript abundance during an anaerobic/micro-aerobic cycle**

466 Transcriptional investigations in *Accumulibacter* have illuminated how the complex and  
467 unique metabolism of this lineage is a result of highly dynamic gene expression (46, 48, 69, 70).  
468 Recently, the power of time series metatranscriptomics was used to analyze gene expression  
469 patterns in *Accumulibacter* during an anaerobic-aerobic EBPR cycle (46). This study was carried  
470 out with high oxygen concentrations in a reactor where nitrification was inhibited and anoxic  
471 respiration did not take place. In order to study the effect of limited oxygen conditions in the  
472 expression of the respiratory machinery of *Accumulibacter* UW-LDO-IC, we used a similar time  
473 series high-resolution RNA-seq approach and contrasted the effect of high/low oxygen in the  
474 metabolism of this strain.

475 A time-series metatranscriptomic dataset of the lab-scale reactor was obtained in  
476 collaboration with DOE-JGI. Samples were collected at the beginning of the anaerobic stage and  
477 at different times during the micro-aerobic stage when DO conditions were ~0.05 mg/L and 0.25  
478 mg/L, respectively (Fig. 1). RNA sequencing resulted in 1,718,478,214 total reads across the six  
479 samples (Table S3). Quality filtering, merging, and rRNA removal resulted in 396,995,401  
480 sequences for downstream analysis. Resulting reads were then competitively mapped to  
481 *Accumulibacter* UW-LDO-IC and other publicly available *Accumulibacter* complete and draft  
482 genomes, including clades IA, IB, IIA, IIC and IIF (Table S9). Between 48-50% of each  
483 sample's filtered RNA reads mapped to the genome of UW-LDO-IC, indicating that this was the  
484 most active bacterium in the community. No other genome of *Accumulibacter* retrieved more

485 than 0.52% of mapping reads, and therefore, strains closely related to other available  
486 *Accumulibacter* genomes were not active members of the community.

487       Transcripts mapping to genes related to denitrification were investigated by analyzing  
488 *Accumulibacter* UW-LDO-IC gene expression patterns during the cycle. Fig. 3 depicts the  
489 relative expression of genes encoding the *nar*, *nir*, *nor* and *nos* operons, and nitrite-nitrate  
490 transporters (*narK*) at each time point; the minimum expression of each gene was subtracted  
491 from each point to allow better visualization of the dynamics of each gene over the course of the  
492 cycle. All subunits of the *narGHJI* operon showed similar patterns, with transcript abundance  
493 increasing during the anaerobic stage, followed by a decrease in transcript levels as the oxygen  
494 concentration increased in the system at the end of the cycle (Fig. 3A). Only one of the three  
495 *nirS* copies (*nirS-1*) present in *Accumulibacter* UW-LDO-IC showed an increment on its  
496 transcript abundance during the cycle (maximum  $\Delta\log_2(\text{RPKM})$  read count  $>1$ ), with a pattern  
497 similar to that of the *narGHJI* operon (Fig. 3B). Transcripts from the *narK* and *nosZ* genes also  
498 increased during the anaerobic stage, but their abundance started decreasing as soon as air was  
499 introduced to the reactor (Fig. 3D-E). The gene *norZ* did not display a notable change in relative  
500 transcript abundance (maximum  $\Delta\log_2(\text{RPKM})$  read count  $<1$ ), although its expression increased  
501 over time (Fig. 3C). These observations are consistent with upregulation of denitrifying genes  
502 during the anaerobic stage, suggesting that oxygen concentration plays an important role in  
503 transcriptional regulation of these genes, as has been previously described (71).

504       Similar transcript trends for denitrification-associated genes have been previously  
505 described in *Accumulibacter*, in reactors operating with anaerobic/aerobic cycles that used high  
506 aeration rates and where nitrification was chemically inhibited with allylthiourea (46, 69). In  
507 general, these studies showed upregulation of denitrification genes during anaerobic conditions

508 and a reduction in transcript abundance when oxygen was introduced to the system. However,  
509 unlike the results observed at high-DO (46), our observations indicate that transcript abundance  
510 remains high after oxygen addition, when simultaneous nitrification/denitrification is occurring.  
511 The *norZ* gene expression pattern under low-oxygen also differs from the one reported at high-  
512 DO (46), since the transcripts of this gene in UW-LDO-IC did not considerably change during  
513 the aerobic period, whereas transcripts in UW-1 exhibited high variations during the operational  
514 cycle (Fig, 4B). Furthermore *nosZ* transcript levels under oxygen-limited conditions displayed a  
515 slower decrement rate than what was reported at high-DO (46), where negligible expression was  
516 observed after 1 hour of aeration, and similar results were described in S. M. He and K. D.  
517 McMahon (69) (Fig, 4C). Since the complete denitrification pathway was not present in the  
518 *Accumulibacter* UW-1 genome, no information about *nar* operon expression was available prior  
519 to our study.

520 Previous studies have confirmed *Accumulibacter*'s capability to synthesize denitrification-  
521 associated proteins. In J. J. Barr et al. (47), nitrite and nitrous oxide reductase enzymes were  
522 detected by metaproteomic analysis of an *Accumulibacter*-enriched microbial community. No  
523 nitric oxide reductase protein was detected in this study, despite the presence of the gene *norZ* in  
524 the genome of the strain enriched in this system, *Accumulibacter* BA-93 (IA). As observed in  
525 Fig. 3C, *norZ* transcript levels in UW-LDO-IC did not considerably changed over time,  
526 potentially indicating a low transcriptional level response to changes in oxygen or nitrite/nitrate  
527 concentrations, hence other regulatory mechanisms might control synthesis of this enzyme.  
528 Further experiments are still needed to understand whether post-transcriptional regulation would  
529 be also controlling denitrification-associated protein synthesis in *Accumulibacter*.

530 Changes in the expression of terminal oxidases in UW-LDO-IC were also identified. All  
531 subunits of the terminal cytochrome c oxidase *aa<sub>3</sub>* were upregulated during the entire micro-  
532 aerobic phase (Fig. 5A), indicating active aerobic respiration by this microorganism.  
533 Transcriptomic results also showed that the *cbb<sub>3</sub>*-type cytochrome oxidase transcripts decreased  
534 when DO increased in the reactor (Fig. 5B). Changes in cytochrome *ba<sub>3</sub>* oxidase transcript levels  
535 were less pronounced than those observed in the other terminal oxidases (maximum  
536  $\Delta\log_2(\text{RPKM})$  read count < 0.5) (Fig. 5C), likely indicating a minor role of this enzyme during  
537 redox condition variations.

538 We compared the expression of these genes during high and low oxygen concentrations  
539 using data from reference (46) (Fig. 4). In both cases, the transcriptional expression of the low-  
540 affinity *aa<sub>3</sub>* cytochrome oxidase increased during the aerobic stage and remained upregulated  
541 until the cycle end (Fig. 4D). On the other side, *cbb<sub>3</sub>*-type cytochrome oxidase transcript  
542 abundance drastically decreased after turning on aeration in the high-aerated system, whereas the  
543 same gene in UW-LDO-IC remained upregulated during the first hour of minimal aeration,  
544 corroborating its function as a terminal oxidase induced by limited-oxygen conditions (Fig. 4E).  
545 Unlike UW-LDO-IC, *Accumulibacter* UW-1 had high *ba<sub>3</sub>* cytochrome c oxidase expression  
546 during the anaerobic stages, which declined after aeration started (Fig. 4F). Differences in the  
547 expression profile of the latter cytochrome suggests differential gene expression control among  
548 these two clades.

549 Overall, these results demonstrated how expression patterns of the genes responsible for  
550 denitrification and aerobic respiration, specifically *nar*, *nir* and *cbb<sub>3</sub>*, showed upregulation  
551 during the beginning of the micro-aerobic stage, supporting our hypothesis that *Accumulibacter*



552 UW-LDO-IC is a denitrifying microorganism capable of simultaneously respiring oxygen and  
553 nitrate under micro-aerobic conditions.

#### 554 **Validation of RNA-seq with RT-qPCR**

555 RT-qPCR was conducted on six genes related to anoxic and aerobic respiration (*narG*, *nirS*-  
556 *1*, *norZ*, *nosZ*, *ccoN* and *ctaD*) to validate RNA sequencing results (Fig. 6). The no-reverse  
557 transcription control (NRTC) was used to evaluate the background caused by trace DNA  
558 contamination. The average of the difference in Ct (threshold cycle) values between the cDNA  
559 and NRTC control was 10 cycles, indicating that DNA contamination was negligible. The copy  
560 number of the RNA polymerase sigma-54 factor, encoded by the *rpoN* gene, was used as a  
561 reference gene for normalization of the RT-qPCR data, since this gene showed no significant  
562 changes ( $\Delta\text{RPKM} < 1$ ) in the RNA sequencing results and has been previously used as a  
563 reference gene for qPCR normalization in other bacteria (72). The RT-qPCR transcriptomic  
564 profile in Fig. 6 was obtained by normalizing each point by the minimum number of copies  
565 across the cycle. In all cases, genes regulation trends identified by RT-qPCR agree with those by  
566 RNA sequencing (Fig. 6), considering a Pearson correlation coefficient  $> 0.5$ , except for *norZ*,  
567 where no significant changes in the expression of this gene was quantified (fold-change  $< 2$ ).

#### 568 **FNR-type regulator controlling denitrification and aerobic respiration in** 569 **Accumulibacter.**

570  
571 To identify putative regulatory mechanisms of Accumulibacter's respiratory machinery, an  
572 upstream motif analysis was conducted. A sequence motif was identified in the intergenic  
573 regions upstream of genes with similar expression patterns: *nar*, *nir*, *nos* and *cbb<sub>3</sub>* operons of  
574 Accumulibacter UW-LDO-IC (Fig. 7A). Comparison of this motif with the Prokaryote DNA

575 motif database, using the scanning algorithm Tomtom (73) ( $p$ -value =  $3.04e-08$ ), classified this  
576 sequence as the binding site of FNR, a relatively well-studied member of the CRP/FNR family of  
577 transcriptional regulators previously characterized in other proteobacteria (74). FNR is a global  
578 regulator of the anaerobic metabolism, reported to be necessary for expression of denitrification  
579 and aerobic respiratory pathways (75) and its activity is directly inhibited by oxygen via  
580 destruction of a labile iron-sulfur cluster (76).

581 Subsequent homology searches of this motif sequence were performed in the intergenic  
582 region of other genomes of *Accumulibacter* ( $p$ -values <  $1e-05$ ). The computational analysis  
583 predicted this motif to be located upstream of 165 different genes/operons across all genomes.  
584 According to the KEGG category III classification, the majority of these genes appear to be part  
585 of metabolic processes involved in carbohydrate and energy metabolism (Fig. 7B). Fig. 7C lists  
586 genes with an FNR motif present in at least four *Accumulibacter* genomes. According to this  
587 analysis, FNR auto regulates its own expression, the transcription of genes involved in (a)  
588 denitrification, (b) aerobic respiration, including the *aa<sub>3</sub>* and *ba<sub>3</sub>* cytochrome oxidases operons,  
589 (c) the biosynthesis of tetrapyrrole heme rings, a prosthetic group of many proteins involved in  
590 respiration and the metabolism and transport of oxygen (77), and (c) cytochromes *c2* and *c4*,  
591 which are electron donors for *aa<sub>3</sub>* and *cbb<sub>3</sub>* oxidases (78, 79).

592 Furthermore, FNR seems to participate in the regulation of carbon uptake, since in many  
593 cases, its binding site was positioned upstream of a phosphate acetyltransferase (*pta*) (Fig. 7C).  
594 Previously, another palindromic sequence was identified upstream of this gene and postulated  
595 this motif as the transcriptional factor PhaR binding site (46). Our findings point to another  
596 regulatory mechanism for carbon uptake, relying on oxygen availability. In *Escherichia coli*,  
597 chromatin immunoprecipitation sequencing (ChIP-seq) tests revealed a putative binding site for

598 FNR upstream of the *pta* operon (80) and RT-qPCR experiments in *fnr* mutants demonstrated  
599 that this regulator has a positive effect on the operon transcription (81). Although the FNR  
600 binding site was also located upstream of polyhydroxyalkanoic acid (PHA) synthase (*phaC*) in  
601 multiple genomes of *Accumulibacter*, S. M. He and K. D. McMahon (69) did not observe  
602 changes in the transcript abundance of *phaC* after exposure to oxygen and, to our knowledge,  
603 FNR regulation has not been connected to PHA synthesis in other studied organisms. However,  
604 since regulation may vary among *Accumulibacter* clades, further experiments still need to be  
605 carried out to evaluate the effect of oxygen on PHA accumulation in *Accumulibacter*.  
606 Furthermore, in a few *Accumulibacter* genomes, the FNR motif was also found upstream of  
607 genes involved in glycolysis/gluconeogenesis (pyruvate dehydrogenase E1 component (*aceE*),  
608 phosphoenolpyruvate carboxykinase (*pepck*) and pyruvate kinase (*pkm*)), which may indicate  
609 evolution of this pathway towards an oxygen-independent mechanism. Overall, these results  
610 provide evidence for oxygen-driven gene expression regulation, not only as an important factor  
611 in the adaptation of *Accumulibacter*'s metabolism to low-DO and anoxic conditions, but also in  
612 that oxygen concentration may directly influence *Accumulibacter*'s ability to metabolize carbon.

613 The transcriptional pattern of genes with putative FNR binding sites in UW-LDO-IC were  
614 analyzed for O<sub>2</sub>-dependant changes in transcript abundance. The expression profile of 25  
615 operons were grouped by similarity (Pearson correlation), resulting in 6 clusters with different  
616 transcriptional patterns regulated in an oxygen-dependent manner (Fig. 8). Three of these  
617 clusters were associated with positive control by FNR, since they showed increase in transcript  
618 abundance during early anaerobic (Cluster A), late anaerobic (Cluster B) and early micro-aerobic  
619 (Cluster C) stages. These three clusters included genes implicated in denitrification (*nar*, *nir* and  
620 *nos* operons), micro-aerobic respiration (*cco* operon and *hemN*), electron transport (cytochrome

621 c2 and c4), response to stress (*uspA*), oxygen detection (hemerythrin) and acetate-uptake (*pta*).  
622 On the contrary, Clusters C, D and E showed negative regulation by FNR (Fig. 8). The unique  
623 transcriptional profile of the transcriptional regulator FNR (Cluster C) might be attributed to the  
624 effect of negative autoregulation that FNR has on its own transcription during anaerobic  
625 conditions (82). Finally, Clusters D and E were induced during the aerobic stage, with Cluster D  
626 comprising genes induced during the entire aerobic stage, and Cluster E genes with higher  
627 expression at the end of the cycle (Fig. 8). The machinery for aerobic respiration under high-  
628 oxygen conditions was enclosed by Cluster E, including the low-O<sub>2</sub> affinity cytochromes *aa<sub>3</sub>* and  
629 *ba<sub>3</sub>* oxidases and a protein involved in the synthesis of heme A, a prosthetic group required  
630 by cytochrome a-type respiratory oxidases. Interestingly, the first subunit of the *ba<sub>3</sub>* oxidase  
631 enzyme was not identified as part of this operon, which may explain the differences observed in  
632 the expression levels (Fig. 5C). A second copy of the nitrite reductase enzyme (*nirS-2*) also  
633 clustered within this group displaying higher transcript abundance during the aerobic stage.  
634 Differences in the regulatory mechanisms of these homologs might be a consequence of gene  
635 acquisition from different systems.

636 The existence of different expression patterns in genes putatively regulated by FNR,  
637 indicates that its transcription could be affected by additional regulatory mechanisms, such as  
638 combinatorial binding of other regulators and/or epigenetic signals (83). Other transcriptional  
639 factors identified in the *Accumulibacter* genomes, including NreABC, NsrR, NorR and RegAB,  
640 might also serve as signals of none or low-oxygen concentration and regulate part of the anoxic  
641 and aerobic respiratory pathways, as it has been described in other microorganisms (84-87).  
642 However, at the time, no other binding site associated to one of these regulatory elements has  
643 been identified in *Accumulibacter*.

644 Overall, this study dissects the metabolic response of *Accumulibacter* to oxygen-limited  
645 conditions. The comparative genomic results provide evidence for the unique respiratory  
646 machinery encoded in the newly assembled genome, *Accumulibacter* UW-LDO-IC, which  
647 confers this strain the capability to simultaneously reduce oxygen and nitrogenous compounds.  
648 Simultaneous upregulation of both aerobic and anoxic respiratory pathways and co-regulation by  
649 the FNR transcriptional factor further support the use of multiple electron acceptors by UW-  
650 LDO-IC. Further studies should include experiments analyzing the transcriptional regulation of  
651 these pathways at a genome-scale level, using modern approaches such as transcriptional  
652 regulatory networks (TRN) and genome wide binding site-locations methods, like ChIP-seq (88)  
653 and DNA affinity purification (DAP)- sequencing (89).

#### 654 **ACKNOWLEDGMENTS**

655 This work was partially supported by funding from the National Science Foundation (CBET-  
656 1435661, CBET-1803055 and MCB-1518130), the UW-Madison Office of the Vice Chancellor  
657 for Research and Graduate Education, and the Madison Metropolitan Sewerage District.  
658 Additional funding from the Chilean National Commission for Scientific and Technological  
659 Research (CONICYT) as a fellowship to Pamela Camejo is also acknowledged. The work  
660 conducted by the U.S. Department of Energy Joint Genome Institute, a DOE Office of Science  
661 User Facility, is supported by the Office of Science of the U.S. Department of Energy under  
662 Contract No. DE-AC02-05CH11231. Any opinions expressed in this paper are those of the  
663 authors and do not necessarily reflect the views of the agency; therefore, no official endorsement  
664 should be inferred. Any mention of trade names or commercial products does not constitute  
665 endorsement or recommendation for use.

#### 666 **FIGURES**

667 **Figure 1. Nutrient profile of phosphorus, acetate, nitrogenous compounds and oxygen**  
668 **concentration in the lab-scale SBR on day-522.** Dotted lines separate anaerobic (ANA), micro-  
669 aerobic (AER) and settling (SET) periods. Red bars indicate time-points used for RNA-seq  
670 (letters in red corresponds to samples names). The period of Media A (acetate and phosphate  
671 containing) and Media B (ammonia containing) addition are indicated for the anaerobic stage.

672 **Figure 2. Phylogeny of Accumulibacter UW-LDO-IC.** (A) Neighbor-joining phylogenetic  
673 tree based on nucleic acid sequences of *ppk1* found in Accumulibacter genomes. (B) RAxML  
674 phylogenetic tree of a concatenated alignment of 38 marker genes (nucleotide sequences) of the  
675 Accumulibacter genus. Bootstrap values are shown in the tree branches based on 1000 and 100  
676 bootstrap replicates, respectively. The scale bar represents the number of nucleotide substitutions  
677 per site.

678 **Figure 3. Gene expression profile patterns of denitrifying-related genes.** Relative  
679 transcript abundances of (A) nitrate, (B) nitrite, (C) nitric oxide and (D) nitrous oxide reductase  
680 genes, and (E) nitrite/nitrate transporters in Accumulibacter UW-LDO-IC during the anaerobic  
681 (white panel) and micro-aerobic (grey panel) phases. Each time point's expression value was  
682 normalized to the minimum expression of each gene over the cycle.

683 **Figure 4. Gene expression comparison among Clade IC and IIA.** Normalized transcript  
684 abundance of denitrification-related genes: (A) *nirS*, (B) *norZ* and (C) *nosZ*; and aerobic  
685 respiration-related genes: (D) *aa<sub>3</sub>* cytochrome subunit I, (E) *cbb<sub>3</sub>* subunit ccoN and (F) *ba<sub>3</sub>*  
686 subunit *cbaA* of Accumulibacter UW-TNR-IC (solid line) and UW-1 (dotted line) (46) during  
687 the aerobic stage of an EBPR cycle.

688 **Figure 5. Gene expression profile patterns of aerobic respiration-related genes.** Relative  
689 transcripts abundance of (A) *aa<sub>3</sub>*, (B) *cbb<sub>3</sub>* and (C) *ba<sub>3</sub>* cytochrome c oxidases in Accumulibacter

690 UW-TNR-IC during the anaerobic (white panel) and micro-aerobic (grey panel) phases. Each  
691 time point's expression value was normalized to the minimum expression of each gene over the  
692 cycle.

693 **Figure 6.** Comparison of the transcriptomic profiles obtained from RT-qPCR (gene copies  
694 normalized by *rpoN* copies, solid black lines) and RNA sequencing ( $\Delta\text{Log}_2$  RPKM, dotted red  
695 lines). Expression of genes involved in denitrification, *narG*, *nirS*, *norZ* and *nosZ*, are presented  
696 in panels A-D. Genes involved in aerobic respiration, *ccoN* (*cbb<sub>3</sub>*) and *ctaD* (*aa<sub>3</sub>*) are included in  
697 panels E-F.

698 **Figure 7. The FNR regulon in Accumulibacter.** (A) Motif diagram showing a putative  
699 FNR-binding site identified upstream of respiratory genes. (B) Distribution of KEGG functional  
700 categories in the fraction of genes with the FNR motif in genomes of Accumulibacter. (C) The  
701 predicted conservation of the FNR regulon determined in the Accumulibacter lineage; only genes  
702 with motifs present in at least 4 genomes are shown. Black indicates that the corresponding strain  
703 does not possess the corresponding gene, blue indicates that the strain possesses the gene, but an  
704 FNR-motif was not located within the upstream intergenic region. Yellow indicates that the gene  
705 with an FNR-motif is present in the genome.

706 **Figure 8. Transcription profile heatmap of members of the FNR regulon in UW-LDO-**  
707 **IC.** The colors represent the relative level of mRNA abundance at each time point of the cycle  
708 compared to the mean level of expression (yellow=high expression, dark blue=low expression).  
709 Genes were clustered according to their expression profiles. Lateral grey bars indicate genes  
710 belonging to the same operon. Group A and B contain genes whose expression levels negatively  
711 correlate with oxygen tension (positively regulated by FNR). Group C, D and E contains genes

712 upregulated during high oxygen levels (negatively regulated by FNR). ANA: anaerobic, AER:  
713 micro-aerobic.

714  
715

## 716 REFERENCES

717

718 1. Mielczarek AT, Nguyen HT, Nielsen JL, Nielsen PH. 2013. Population dynamics of  
719 bacteria involved in enhanced biological phosphorus removal in Danish wastewater  
720 treatment plants. *Water Res* 47:1529-44.

721 2. Lemaire R, Yuan Z, Blackall LL, Crocetti GR. 2008. Microbial distribution of  
722 *Accumulibacter* spp. and *Competibacter* spp. in aerobic granules from a lab-scale  
723 biological nutrient removal system. *Environ Microbiol* 10:354-63.

724 3. Wang X, Wang S, Xue T, Li B, Dai X, Peng Y. 2015. Treating low carbon/nitrogen  
725 (C/N) wastewater in simultaneous nitrification-endogenous denitrification and  
726 phosphorous removal (SNDPR) systems by strengthening anaerobic intracellular carbon  
727 storage. *Water Res* 77:191-200.

728 4. Yilmaz G, Lemaire R, Keller J, Yuan Z. 2008. Simultaneous nitrification, denitrification,  
729 and phosphorus removal from nutrient-rich industrial wastewater using granular sludge.  
730 *Biotechnol Bioeng* 100:529-41.

731 5. Mino T, Van Loosdrecht MCM, Heijnen JJ. 1998. Microbiology and biochemistry of the  
732 enhanced biological phosphate removal process. *Water Research* 32:3193-3207.

733 6. He S, Gall DL, McMahon KD. 2007. "Candidatus *accumulibacter*" population structure  
734 in enhanced biological phosphorus removal Sludges as revealed by polyphosphate kinase  
735 genes. *Applied and Environmental Microbiology* 73:5865-5874.



- 736 7. Peterson SB, Warnecke F, Madejska J, McMahon KD, Hugenholtz P. 2008.  
737 Environmental distribution and population biology of *Candidatus Accumulibacter*, a  
738 primary agent of biological phosphorus removal. *Environmental Microbiology* 10:2692-  
739 2703.
- 740 8. Camejo PY, Owen BR, Martirano J, Ma J, Kapoor V, Santo Domingo J, McMahon KD,  
741 Noguera DR. 2016. *Candidatus Accumulibacter phosphatis* clades enriched under cyclic  
742 anaerobic and microaerobic conditions simultaneously use different electron acceptors.  
743 *Water Research* 102:125-137.
- 744 9. Mao Y, Graham DW, Tamaki H, Zhang T. 2015. Dominant and novel clades of  
745 *Candidatus Accumulibacter phosphatis* in 18 globally distributed full-scale wastewater  
746 treatment plants. *Sci Rep* 5:11857.
- 747 10. Flowers JJ, He S, Yilmaz S, Noguera DR, McMahon KD. 2009. Denitrification  
748 capabilities of two biological phosphorus removal sludges dominated by different  
749 "*Candidatus Accumulibacter*" clades. *Environ Microbiol Rep* 1:583-588.
- 750 11. Kim JM, Lee HJ, Lee DS, Jeon CO. 2013. Characterization of the Denitrification-  
751 Associated Phosphorus Uptake Properties of "*Candidatus Accumulibacter phosphatis*"  
752 Clades in Sludge Subjected to Enhanced Biological Phosphorus Removal. *Applied and*  
753 *Environmental Microbiology* 79:1969-1979.
- 754 12. Welles L, Tian WD, Saad S, Abbas B, Lopez-Vazquez CM, Hooijmans CM, van  
755 Loosdrecht MC, Brdjanovic D. 2015. *Accumulibacter* clades Type I and II performing  
756 kinetically different glycogen-accumulating organisms metabolisms for anaerobic  
757 substrate uptake. *Water Res* 83:354-66.

- 758 13. Slater FR, Johnson CR, Blackall LL, Beiko RG, Bond PL. 2010. Monitoring associations  
759 between clade-level variation, overall community structure and ecosystem function in  
760 enhanced biological phosphorus removal (EBPR) systems using terminal-restriction  
761 fragment length polymorphism (T-RFLP). *Water Research* 44:4908-4923.
- 762 14. Cokro AA, Law Y, Williams RBH, Cao Y, Nielsen PH, Wuertz S. 2017. Non-  
763 denitrifying polyphosphate accumulating organisms obviate requirement for anaerobic  
764 condition. *Water Research* 111:393-403.
- 765 15. Carvalho G, Lemos PC, Oehmen A, Reis MAM. 2007. Denitrifying phosphorus removal:  
766 Linking the process performance with the microbial community structure. *Water*  
767 *Research* 41:4383-4396.
- 768 16. Oehmen A, Carvalho G, Lopez-Vazquez CM, van Loosdrecht MCM, Reis MAM. 2010.  
769 Incorporating microbial ecology into the metabolic modelling of polyphosphate  
770 accumulating organisms and glycogen accumulating organisms. *Water Research*  
771 44:4992-5004.
- 772 17. Lanham AB, Moita R, Lemos PC, Reis MA. 2011. Long-term operation of a reactor  
773 enriched in *Accumulibacter* clade I DPAOs: performance with nitrate, nitrite and oxygen.  
774 *Water Sci Technol* 63:352-9.
- 775 18. Saad SA, Welles L, Abbas B, Lopez-Vazquez CM, van Loosdrecht MCM, Brdjanovic D.  
776 2016. Denitrification of nitrate and nitrite by '*Candidatus Accumulibacter phosphatis*'  
777 clade IC. *Water Research* 105:97-109.
- 778 19. Rubio-Rincon FJ, Lopez-Vazquez CM, Welles L, van Loosdrecht MCM, Brdjanovic D.  
779 2017. Cooperation between *Candidatus Competibacter* and *Candidatus Accumulibacter*  
780 clade I, in denitrification and phosphate removal processes. *Water Research* 120:156-164.

- 781 20. Zilles JL, Peccia J, Kim MW, Hung CH, Noguera DR. 2002. Involvement of  
782 Rhodocyclus-related organisms in phosphorus removal in full-scale wastewater treatment  
783 plants. *Applied and Environmental Microbiology* 68:2763-2769.
- 784 21. Park HD, Whang LM, Reusser SR, Noguera DR. 2006. Taking advantage of aerated-  
785 anoxic operation in a full-scale University of Cape Town process. *Water Environment*  
786 *Research* 78:637-642.
- 787 22. APHA. Standard methods for the examination of water and wastewater, p. *In* Andrew D.  
788 Eaton LSC, Eugene W. Rice, Arnold E. Greenberg (ed),
- 789 23. Caporaso JG, Lauber CL, Walters WA, Berg-Lyons D, Lozupone CA, Turnbaugh PJ,  
790 Fierer N, Knight R. 2011. Global patterns of 16S rRNA diversity at a depth of millions of  
791 sequences per sample. *Proceedings of the National Academy of Sciences of the United*  
792 *States of America* 108:4516-4522.
- 793 24. Caporaso JG, Kuczynski J, Stombaugh J, Bittinger K, Bushman FD, Costello EK, Fierer  
794 N, Pena AG, Goodrich JK, Gordon JI, Huttley GA, Kelley ST, Knights D, Koenig JE,  
795 Ley RE, Lozupone CA, McDonald D, Muegge BD, Pirrung M, Reeder J, Sevinsky JR,  
796 Turnbaugh PJ, Walters WA, Widmann J, Yatsunenko T, Zaneveld J, Knight R. 2010.  
797 QIIME allows analysis of high-throughput community sequencing data. *Nature Methods*  
798 7:335-336.
- 799 25. Edgar RC, Haas BJ, Clemente JC, Quince C, Knight R. 2011. UCHIME improves  
800 sensitivity and speed of chimera detection. *Bioinformatics* 27:2194-200.
- 801 26. Mielczarek AT, Saunders AM, Larsen P, Albertsen M, Stevenson M, Nielsen JL, Nielsen  
802 PH. 2013. The Microbial Database for Danish wastewater treatment plants with nutrient

- 803 removal (MiDas-DK) - a tool for understanding activated sludge population dynamics  
804 and community stability. *Water Science and Technology* 67:2519-2526.
- 805 27. Nurk S, Meleshko D, Korobeynikov A, Pevzner PA. 2017. metaSPAdes: a new versatile  
806 metagenomic assembler. *Genome Res* 27:824-834.
- 807 28. Wu YW, Tang YH, Tringe SG, Simmons BA, Singer SW. 2014. MaxBin: an automated  
808 binning method to recover individual genomes from metagenomes using an expectation-  
809 maximization algorithm. *Microbiome* 2.
- 810 29. Parks DH, Imelfort M, Skennerton CT, Hugenholtz P, Tyson GW. 2015. CheckM:  
811 assessing the quality of microbial genomes recovered from isolates, single cells, and  
812 metagenomes. *Genome Res* 25:1043-55.
- 813 30. Darling AE, Jospin G, Lowe E, Matsen FAt, Bik HM, Eisen JA. 2014. PhyloSift:  
814 phylogenetic analysis of genomes and metagenomes. *PeerJ* 2:e243.
- 815 31. Eren AM, Esen OC, Quince C, Vineis JH, Morrison HG, Sogin ML, Delmont TO. 2015.  
816 Anvi'o: an advanced analysis and visualization platform for 'omics data. *PeerJ* 3:e1319.
- 817 32. Warren RL, Yang C, Vandervalk BP, Behsaz B, Lagman A, Jones SJM, Birol I. 2015.  
818 LINKS: Scalable, alignment-free scaffolding of draft genomes with long reads.  
819 *Gigascience* 4.
- 820 33. Hanson NW, Konwar KM, Hawley AK, Altman T, Karp PD, Hallam SJ. 2014. Metabolic  
821 pathways for the whole community. *BMC Genomics* 15:619.
- 822 34. Richter M, Rossello-Mora R. 2009. Shifting the genomic gold standard for the  
823 prokaryotic species definition. *Proceedings of the National Academy of Sciences of the*  
824 *United States of America* 106:19126-19131.

- 825 35. Stamatakis A. 2006. RAxML-VI-HPC: maximum likelihood-based phylogenetic analyses  
826 with thousands of taxa and mixed models. *Bioinformatics* 22:2688-90.
- 827 36. Clark K, Karsch-Mizrachi I, Lipman DJ, Ostell J, Sayers EW. 2016. GenBank. *Nucleic  
828 Acids Research* 44:D67-D72.
- 829 37. Wright ES. 2015. DECIPHER: harnessing local sequence context to improve protein  
830 multiple sequence alignment. *Bmc Bioinformatics* 16.
- 831 38. Magoc T, Salzberg SL. 2011. FLASH: fast length adjustment of short reads to improve  
832 genome assemblies. *Bioinformatics* 27:2957-2963.
- 833 39. Kopylova E, Noe L, Touzet H. 2012. SortMeRNA: fast and accurate filtering of  
834 ribosomal RNAs in metatranscriptomic data. *Bioinformatics* 28:3211-3217.
- 835 40. Bushnell B. 2014. BBMap: A Fast, Accurate, Splice-Aware Aligner. Ernest Orlando  
836 Lawrence Berkeley National Laboratory, Berkeley, CA.
- 837 41. Anders S, Pyl PT, Huber W. 2015. HTSeq-a Python framework to work with high-  
838 throughput sequencing data. *Bioinformatics* 31:166-169.
- 839 42. Mortazavi A, Williams BA, Mccue K, Schaeffer L, Wold B. 2008. Mapping and  
840 quantifying mammalian transcriptomes by RNA-Seq. *Nature Methods* 5:621-628.
- 841 43. Wright ES, Yilmaz LS, Ram S, Gasser JM, Harrington GW, Noguera DR. 2014.  
842 Exploiting extension bias in polymerase chain reaction to improve primer specificity in  
843 ensembles of nearly identical DNA templates. *Environmental Microbiology* 16:1354-  
844 1365.
- 845 44. Bailey TL, Williams N, Misleh C, Li WW. 2006. MEME: discovering and analyzing  
846 DNA and protein sequence motifs. *Nucleic Acids Res* 34:W369-73.

- 847 45. Grant CE, Bailey TL, Noble WS. 2011. FIMO: scanning for occurrences of a given  
848 motif. *Bioinformatics* 27:1017-8.
- 849 46. Oyserman BO, Noguera DR, del Rio TG, Tringe SG, McMahon KD. 2016.  
850 Metatranscriptomic insights on gene expression and regulatory controls in *Candidatus*  
851 *Accumulibacter phosphatis*. *Isme Journal* 10:810-822.
- 852 47. Barr JJ, Dutilh BE, Skennerton CT, Fukushima T, Hastie ML, Gorman JJ, Tyson GW,  
853 Bond PL. 2016. Metagenomic and metaproteomic analyses of *Accumulibacter*  
854 *phosphatis*-enriched floccular and granular biofilm. *Environ Microbiol* 18:273-87.
- 855 48. Mao Y, Yu K, Xia Y, Chao Y, Zhang T. 2014. Genome reconstruction and gene  
856 expression of "*Candidatus Accumulibacter phosphatis*" Clade IB performing biological  
857 phosphorus removal. *Environ Sci Technol* 48:10363-71.
- 858 49. Skennerton CT, Barr JJ, Slater FR, Bond PL, Tyson GW. 2015. Expanding our view of  
859 genomic diversity in *Candidatus Accumulibacter* clades. *Environmental Microbiology*  
860 17:1574-1585.
- 861 50. Flowers JJ, He SM, Malfatti S, del Rio TG, Tringe SG, Hugenholtz P, McMahon KD.  
862 2013. Comparative genomics of two '*Candidatus Accumulibacter*' clades performing  
863 biological phosphorus removal. *Isme Journal* 7:2301-2314.
- 864 51. Wu DY, Jospin G, Eisen JA. 2013. Systematic Identification of Gene Families for Use as  
865 "Markers" for Phylogenetic and Phylogeny-Driven Ecological Studies of Bacteria and  
866 Archaea and Their Major Subgroups. *Plos One* 8:e77033.
- 867 52. Parks DH, Rinke C, Chuvochina M, Chaumeil PA, Woodcroft BJ, Evans PN, Hugenholtz  
868 P, Tyson GW. 2017. Recovery of nearly 8,000 metagenome-assembled genomes  
869 substantially expands the tree of life. *Nature Microbiology* 2:1533-1542.

- 870 53. Konstantinidis KT, Tiedje JM. 2005. Genomic insights that advance the species  
871 definition for prokaryotes. *Proceedings of the National Academy of Sciences of the*  
872 *United States of America* 102:2567-2572.
- 873 54. Varghese NJ, Mukherjee S, Ivanova N, Konstantinidis KT, Mavrommatis K, Kyrpides  
874 NC, Pati A. 2015. Microbial species delineation using whole genome sequences. *Nucleic*  
875 *Acids Res* 43:6761-71.
- 876 55. Oyserman BO, Moya F, Lawson CE, Garcia AL, Vogt M, Heffernen M, Noguera DR,  
877 McMahon KD. 2016. Ancestral genome reconstruction identifies the evolutionary basis  
878 for trait acquisition in polyphosphate accumulating bacteria. *ISME J* 10:2931-2945.
- 879 56. Sparacino-Watkins C, Stolz JF, Basu P. 2014. Nitrate and periplasmic nitrate reductases.  
880 *Chem Soc Rev* 43:676-706.
- 881 57. Ahn J, Daidou T, Tsuneda S, Hirata A. 2001. Metabolic behavior of denitrifying  
882 phosphate-accumulating organisms under nitrate and nitrite electron acceptor conditions.  
883 *J Biosci Bioeng* 92:442-6.
- 884 58. Richardson DJ. 2000. Bacterial respiration: a flexible process for a changing  
885 environment. *Microbiology* 146 ( Pt 3):551-71.
- 886 59. Flory JE, Donohue TJ. 1997. Transcriptional control of several aerobically induced  
887 cytochrome structural genes in *Rhodobacter sphaeroides*. *Microbiology-Sgm* 143:3101-  
888 3110.
- 889 60. Winstedt L, von Wachenfeldt C. 2000. Terminal oxidases of *Bacillus subtilis* strain 168:  
890 one quinol oxidase, cytochrome aa(3) or cytochrome bd, is required for aerobic growth. *J*  
891 *Bacteriol* 182:6557-64.

- 892 61. Arai H, Roh JH, Kaplan S. 2008. Transcriptome dynamics during the transition from  
893 anaerobic photosynthesis to aerobic respiration in *Rhodobacter sphaeroides* 2.4.1. *J*  
894 *Bacteriol* 190:286-99.
- 895 62. Swem DL, Bauer CE. 2002. Coordination of ubiquinol oxidase and cytochrome *cbb(3)*  
896 oxidase expression by multiple regulators in *Rhodobacter capsulatus*. *J Bacteriol*  
897 184:2815-20.
- 898 63. Otten MF, Stork DM, Reijnders WN, Westerhoff HV, Van Spanning RJ. 2001.  
899 Regulation of expression of terminal oxidases in *Paracoccus denitrificans*. *Eur J Biochem*  
900 268:2486-97.
- 901 64. Mouncey NJ, Kaplan S. 1998. Oxygen regulation of the *ccoN* gene encoding a  
902 component of the *cbb3* oxidase in *Rhodobacter sphaeroides* 2.4.1T: involvement of the  
903 *FnrL* protein. *J Bacteriol* 180:2228-31.
- 904 65. Jackson RJ, Elvers KT, Lee LJ, Gidley MD, Wainwright LM, Lightfoot J, Park SF, Poole  
905 RK. 2007. Oxygen reactivity of both respiratory oxidases in *Campylobacter jejuni*: the  
906 *cydAB* genes encode a cyanide-resistant, low-affinity oxidase that is not of the  
907 cytochrome *bd* type. *Journal of Bacteriology* 189:1604-1615.
- 908 66. Preisig O, Zufferey R, Thony-Meyer L, Appleby CA, Hennecke H. 1996. A high-affinity  
909 *cbb3*-type cytochrome oxidase terminates the symbiosis-specific respiratory chain of  
910 *Bradyrhizobium japonicum*. *J Bacteriol* 178:1532-8.
- 911 67. Keene NA, Reusser SR, Scarborough MJ, Grooms AL, Seib M, Santo Domingo J,  
912 Noguera DR. 2017. Pilot plant demonstration of stable and efficient high rate biological  
913 nutrient removal with low dissolved oxygen conditions. *Water Res* 121:72-85.



- 914 68. Soulimane T, Buse G, Bourenkov GP, Bartunik HD, Huber R, Than ME. 2000. Structure  
915 and mechanism of the aberrant ba(3)-cytochrome c oxidase from *Thermus thermophilus*.  
916 *Embo Journal* 19:1766-1776.
- 917 69. He SM, McMahon KD. 2011. 'Candidatus *Accumulibacter*' gene expression in response  
918 to dynamic EBPR conditions. *Isme Journal* 5:329-340.
- 919 70. He SM, Kunin V, Haynes M, Martin HG, Ivanova N, Rohwer F, Hugenholtz P,  
920 McMahon KD. 2010. Metatranscriptomic array analysis of 'Candidatus *Accumulibacter*  
921 *phosphatis*'-enriched enhanced biological phosphorus removal sludge. *Environmental*  
922 *Microbiology* 12:1205-1217.
- 923 71. Bueno E, Mesa S, Bedmar EJ, Richardson DJ, Delgado MJ. 2012. Bacterial adaptation of  
924 respiration from oxic to microoxic and anoxic conditions: redox control. *Antioxid Redox*  
925 *Signal* 16:819-52.
- 926 72. Chang Q, Amemiya T, Liu J, Xu X, Rajendran N, Itoh K. 2009. Identification and  
927 validation of suitable reference genes for quantitative expression of *xylA* and *xylE* genes  
928 in *Pseudomonas putida* mt-2. *J Biosci Bioeng* 107:210-4.
- 929 73. Gupta S, Stamatoyannopoulos JA, Bailey TL, Noble WS. 2007. Quantifying similarity  
930 between motifs. *Genome Biology* 8.
- 931 74. Korner H, Sofia HJ, Zumft WG. 2003. Phylogeny of the bacterial superfamily of Crp-Fnr  
932 transcription regulators: exploiting the metabolic spectrum by controlling alternative gene  
933 programs. *FEMS Microbiol Rev* 27:559-92.
- 934 75. Arai H, Kodama T, Igarashi Y. 1997. Cascade regulation of the two CRP/FNR-related  
935 transcriptional regulators (ANR and DNR) and the denitrification enzymes in  
936 *Pseudomonas aeruginosa*. *Mol Microbiol* 25:1141-8.

- 937 76. Green J, Crack JC, Thomson AJ, LeBrun NE. 2009. Bacterial sensors of oxygen. *Curr*  
938 *Opin Microbiol* 12:145-51.
- 939 77. Rompf A, Hungerer C, Hoffmann T, Lindenmeyer M, Romling U, Gross U, Doss MO,  
940 Arai H, Igarashi Y, Jahn D. 1998. Regulation of *Pseudomonas aeruginosa* hemF and  
941 hemN by the dual action of the redox response regulators Anr and Dnr. *Mol Microbiol*  
942 29:985-97.
- 943 78. Chang HY, Ahn Y, Pace LA, Lin MT, Lin YH, Gennis RB. 2010. The Diheme  
944 Cytochrome c(4) from *Vibrio cholerae* Is a Natural Electron Donor to the Respiratory  
945 cbb(3) Oxygen Reductase. *Biochemistry* 49:7494-7503.
- 946 79. Daldal F, Mandaci S, Winterstein C, Myllykallio H, Duyck K, Zannoni D. 2001. Mobile  
947 cytochrome c2 and membrane-anchored cytochrome cy are both efficient electron donors  
948 to the cbb3- and aa3-type cytochrome c oxidases during respiratory growth of  
949 *Rhodobacter sphaeroides*. *J Bacteriol* 183:2013-24.
- 950 80. Myers KS, Yan H, Ong IM, Chung D, Liang K, Tran F, Keles S, Landick R, Kiley PJ.  
951 2013. Genome-scale analysis of *Escherichia coli* FNR reveals complex features of  
952 transcription factor binding. *PLoS Genet* 9:e1003565.
- 953 81. Shalel-Levanon S, San KY, Bennett GN. 2005. Effect of ArcA and FNR on the  
954 expression of genes related to the oxygen regulation and the glycolysis pathway in  
955 *Escherichia coli* under microaerobic growth conditions. *Biotechnol Bioeng* 92:147-59.
- 956 82. Mettert EL, Kiley PJ. 2007. Contributions of [4Fe-4S]-FNR and integration host factor to  
957 *fnr* transcriptional regulation. *J Bacteriol* 189:3036-43.
- 958 83. Casadesus J, Low D. 2006. Epigenetic gene regulation in the bacterial world. *Microbiol*  
959 *Mol Biol Rev* 70:830-56.

- 960 84. Swem LR, Elsen S, Bird TH, Swem DL, Koch HG, Myllykallio H, Daldal F, Bauer CE.  
961 2001. The RegB/RegA two-component regulatory system controls synthesis of  
962 photosynthesis and respiratory electron transfer components in *Rhodobacter capsulatus*. *J*  
963 *Mol Biol* 309:121-38.
- 964 85. Pohlmann A, Cramm R, Schmelz K, Friedrich B. 2000. A novel NO-responding regulator  
965 controls the reduction of nitric oxide in *Ralstonia eutropha*. *Mol Microbiol* 38:626-38.
- 966 86. Beaumont HJ, Lens SI, Reijnders WN, Westerhoff HV, van Spanning RJ. 2004.  
967 Expression of nitrite reductase in *Nitrosomonas europaea* involves NsrR, a novel nitrite-  
968 sensitive transcription repressor. *Mol Microbiol* 54:148-58.
- 969 87. Nilkens S, Koch-Singenstreu M, Niemann V, Gotz F, Stehle T, Uden G. 2014.  
970 Nitrate/oxygen co-sensing by an NreA/NreB sensor complex of *Staphylococcus carnosus*.  
971 *Mol Microbiol* 91:381-93.
- 972 88. Johnson DS, Mortazavi A, Myers RM, Wold B. 2007. Genome-wide mapping of in vivo  
973 protein-DNA interactions. *Science* 316:1497-502.
- 974 89. O'Malley RC, Huang SC, Song L, Lewsey MG, Bartlett A, Nery JR, Galli M, Gallavotti  
975 A, Ecker JR. 2016. Cistrome and Epicistrome Features Shape the Regulatory DNA  
976 Landscape. *Cell* 166:1598.
- 977





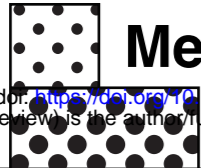

Media B

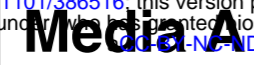

Media A

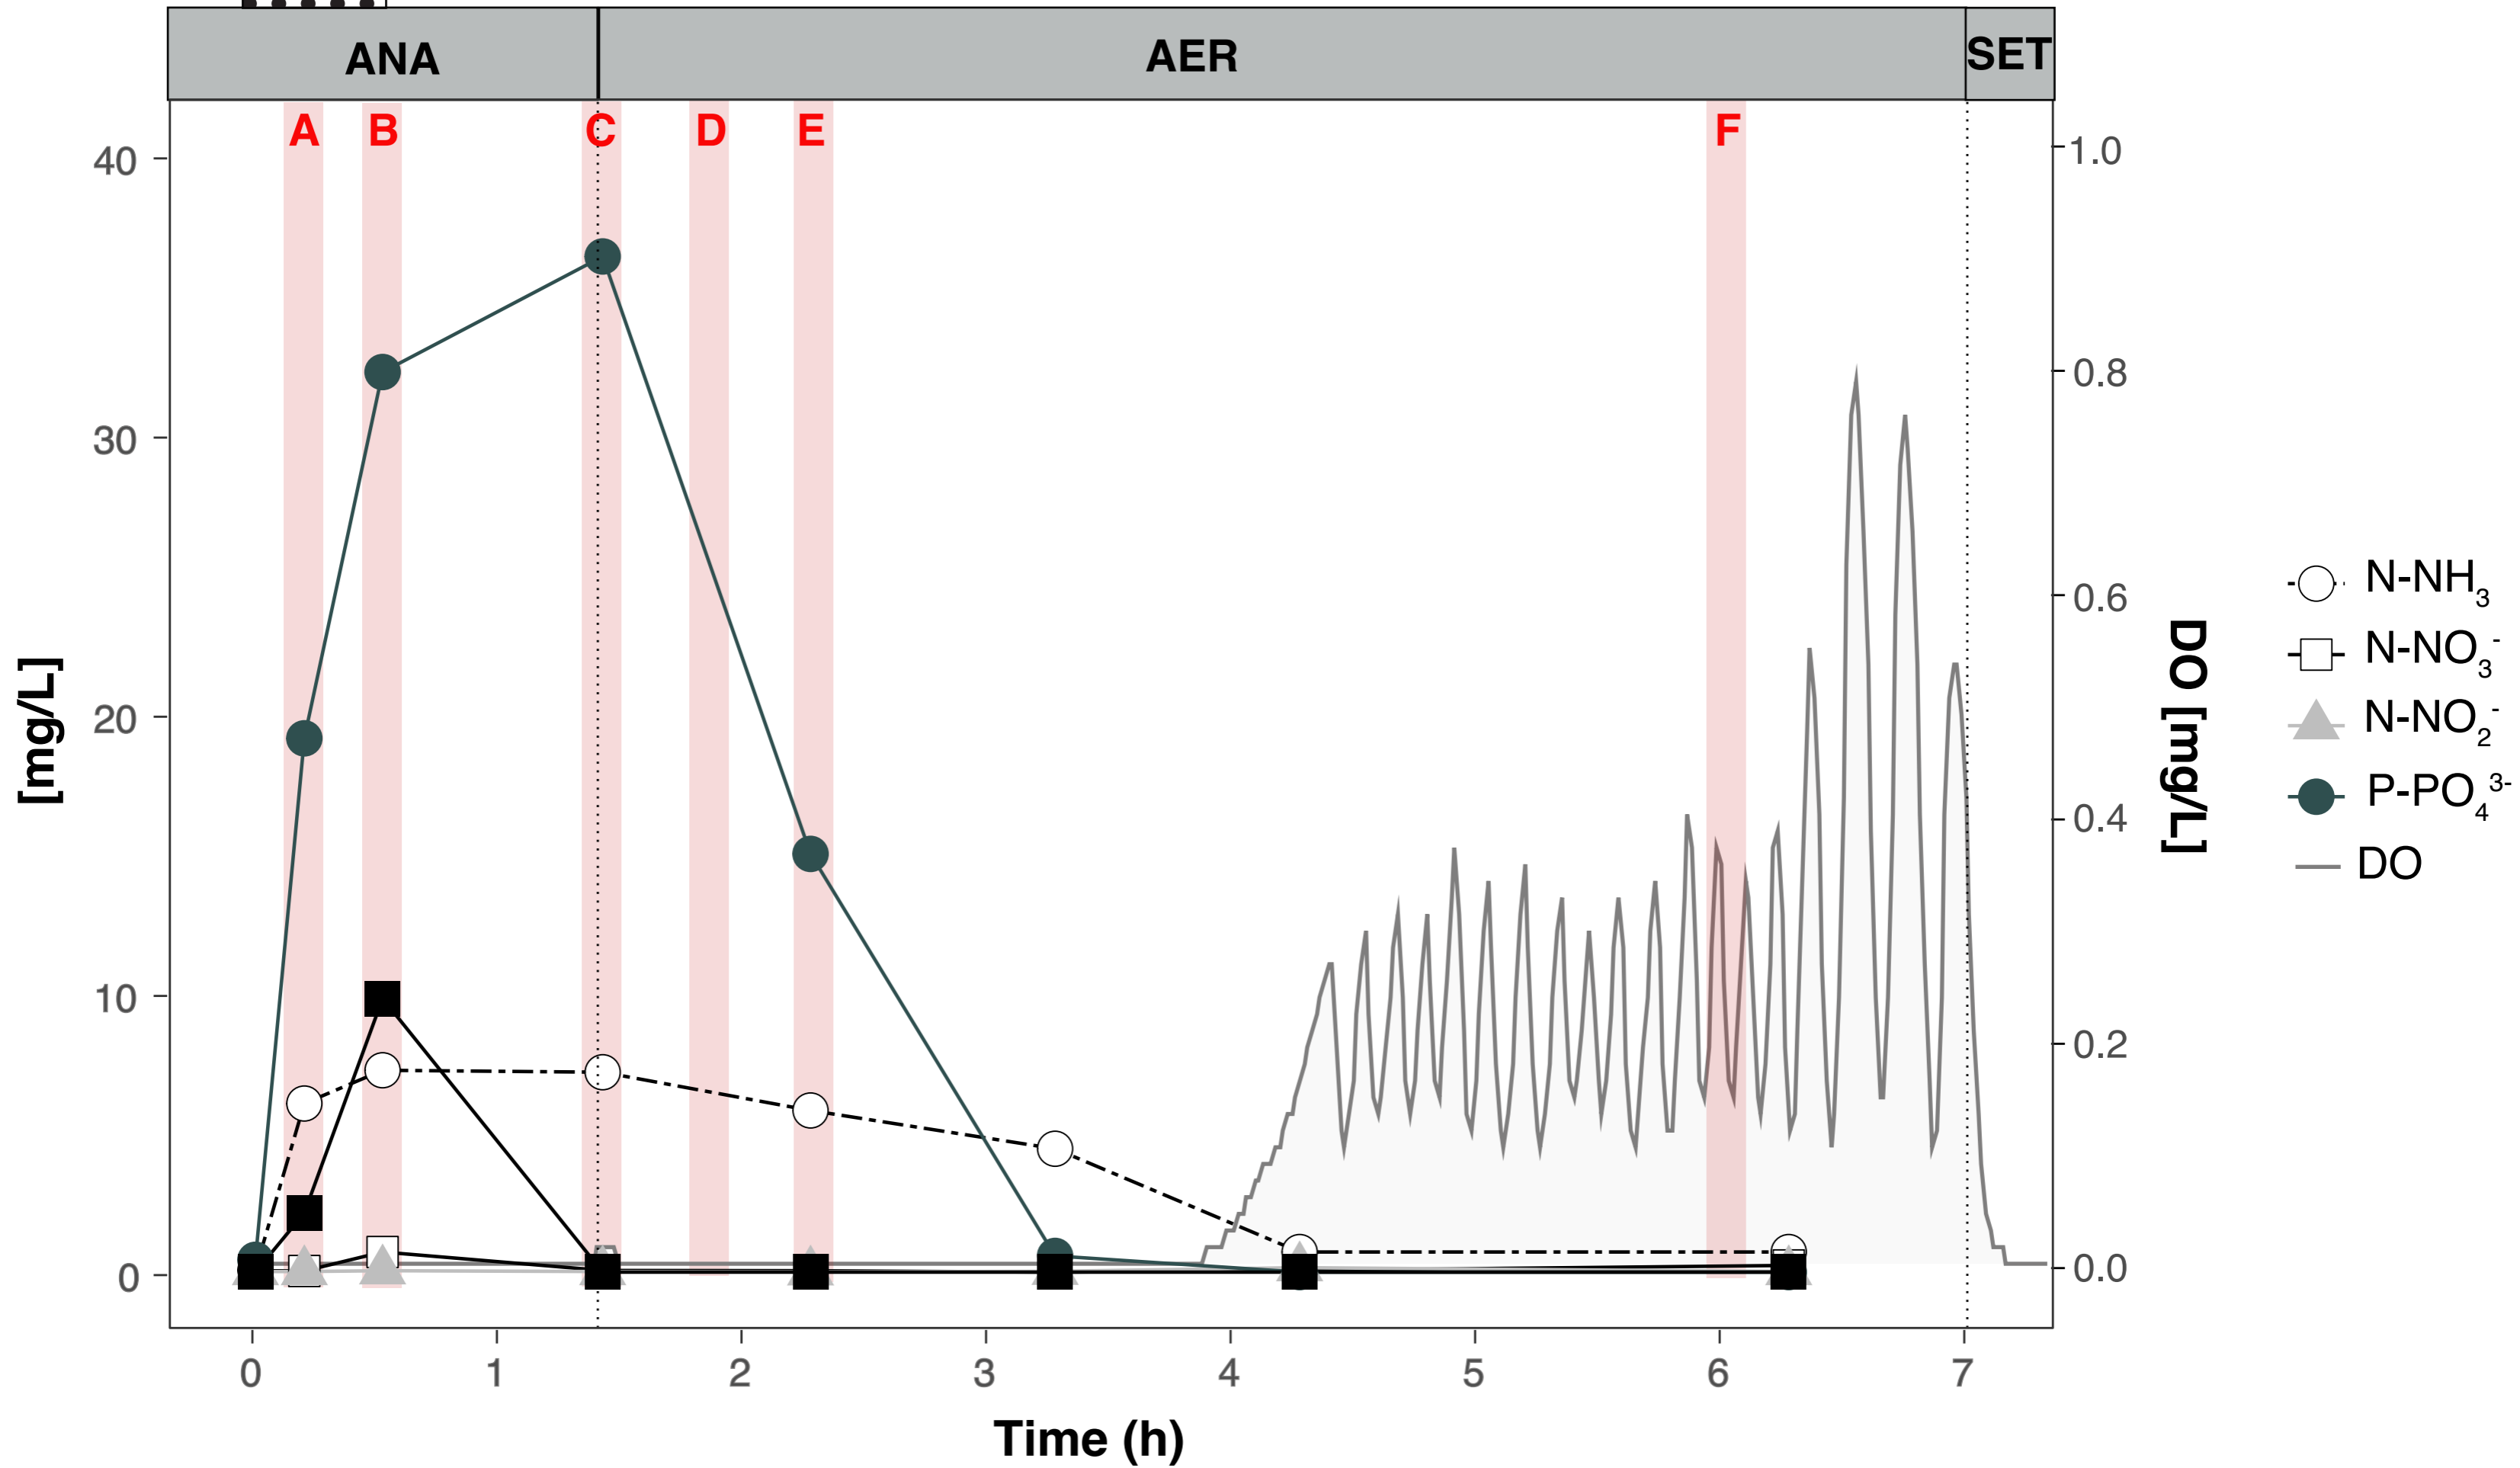

**(A)**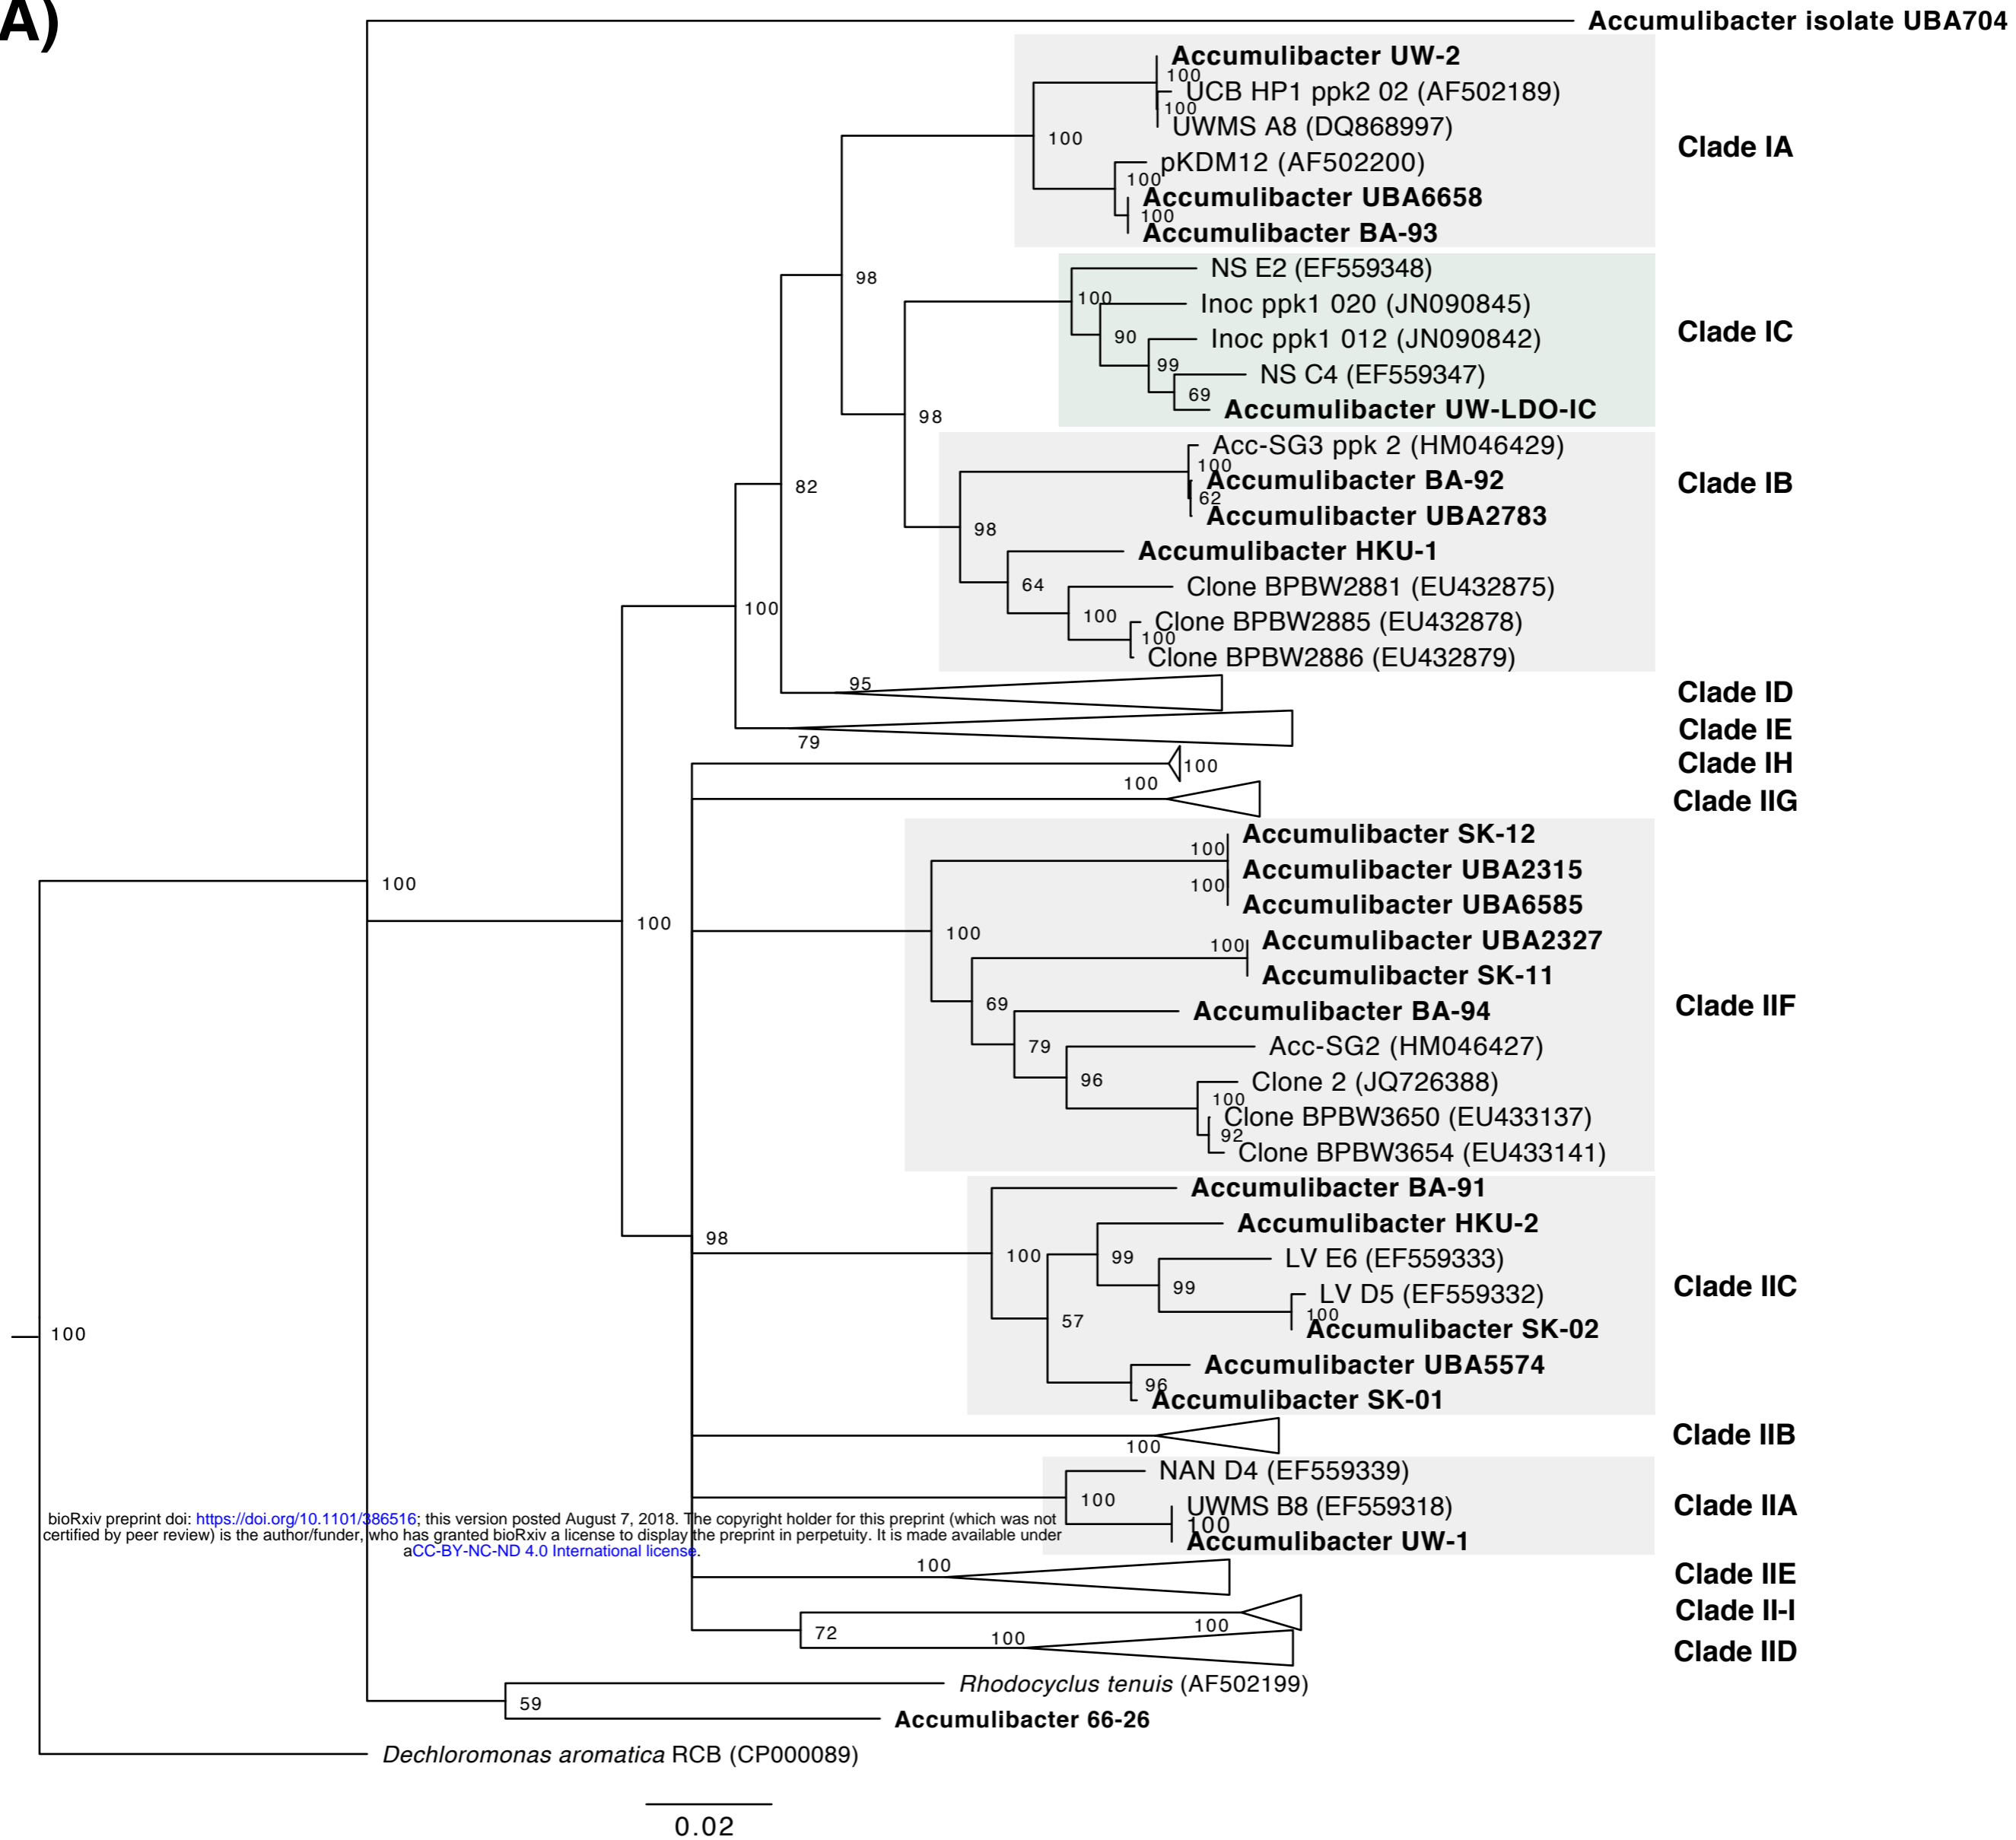**(B)**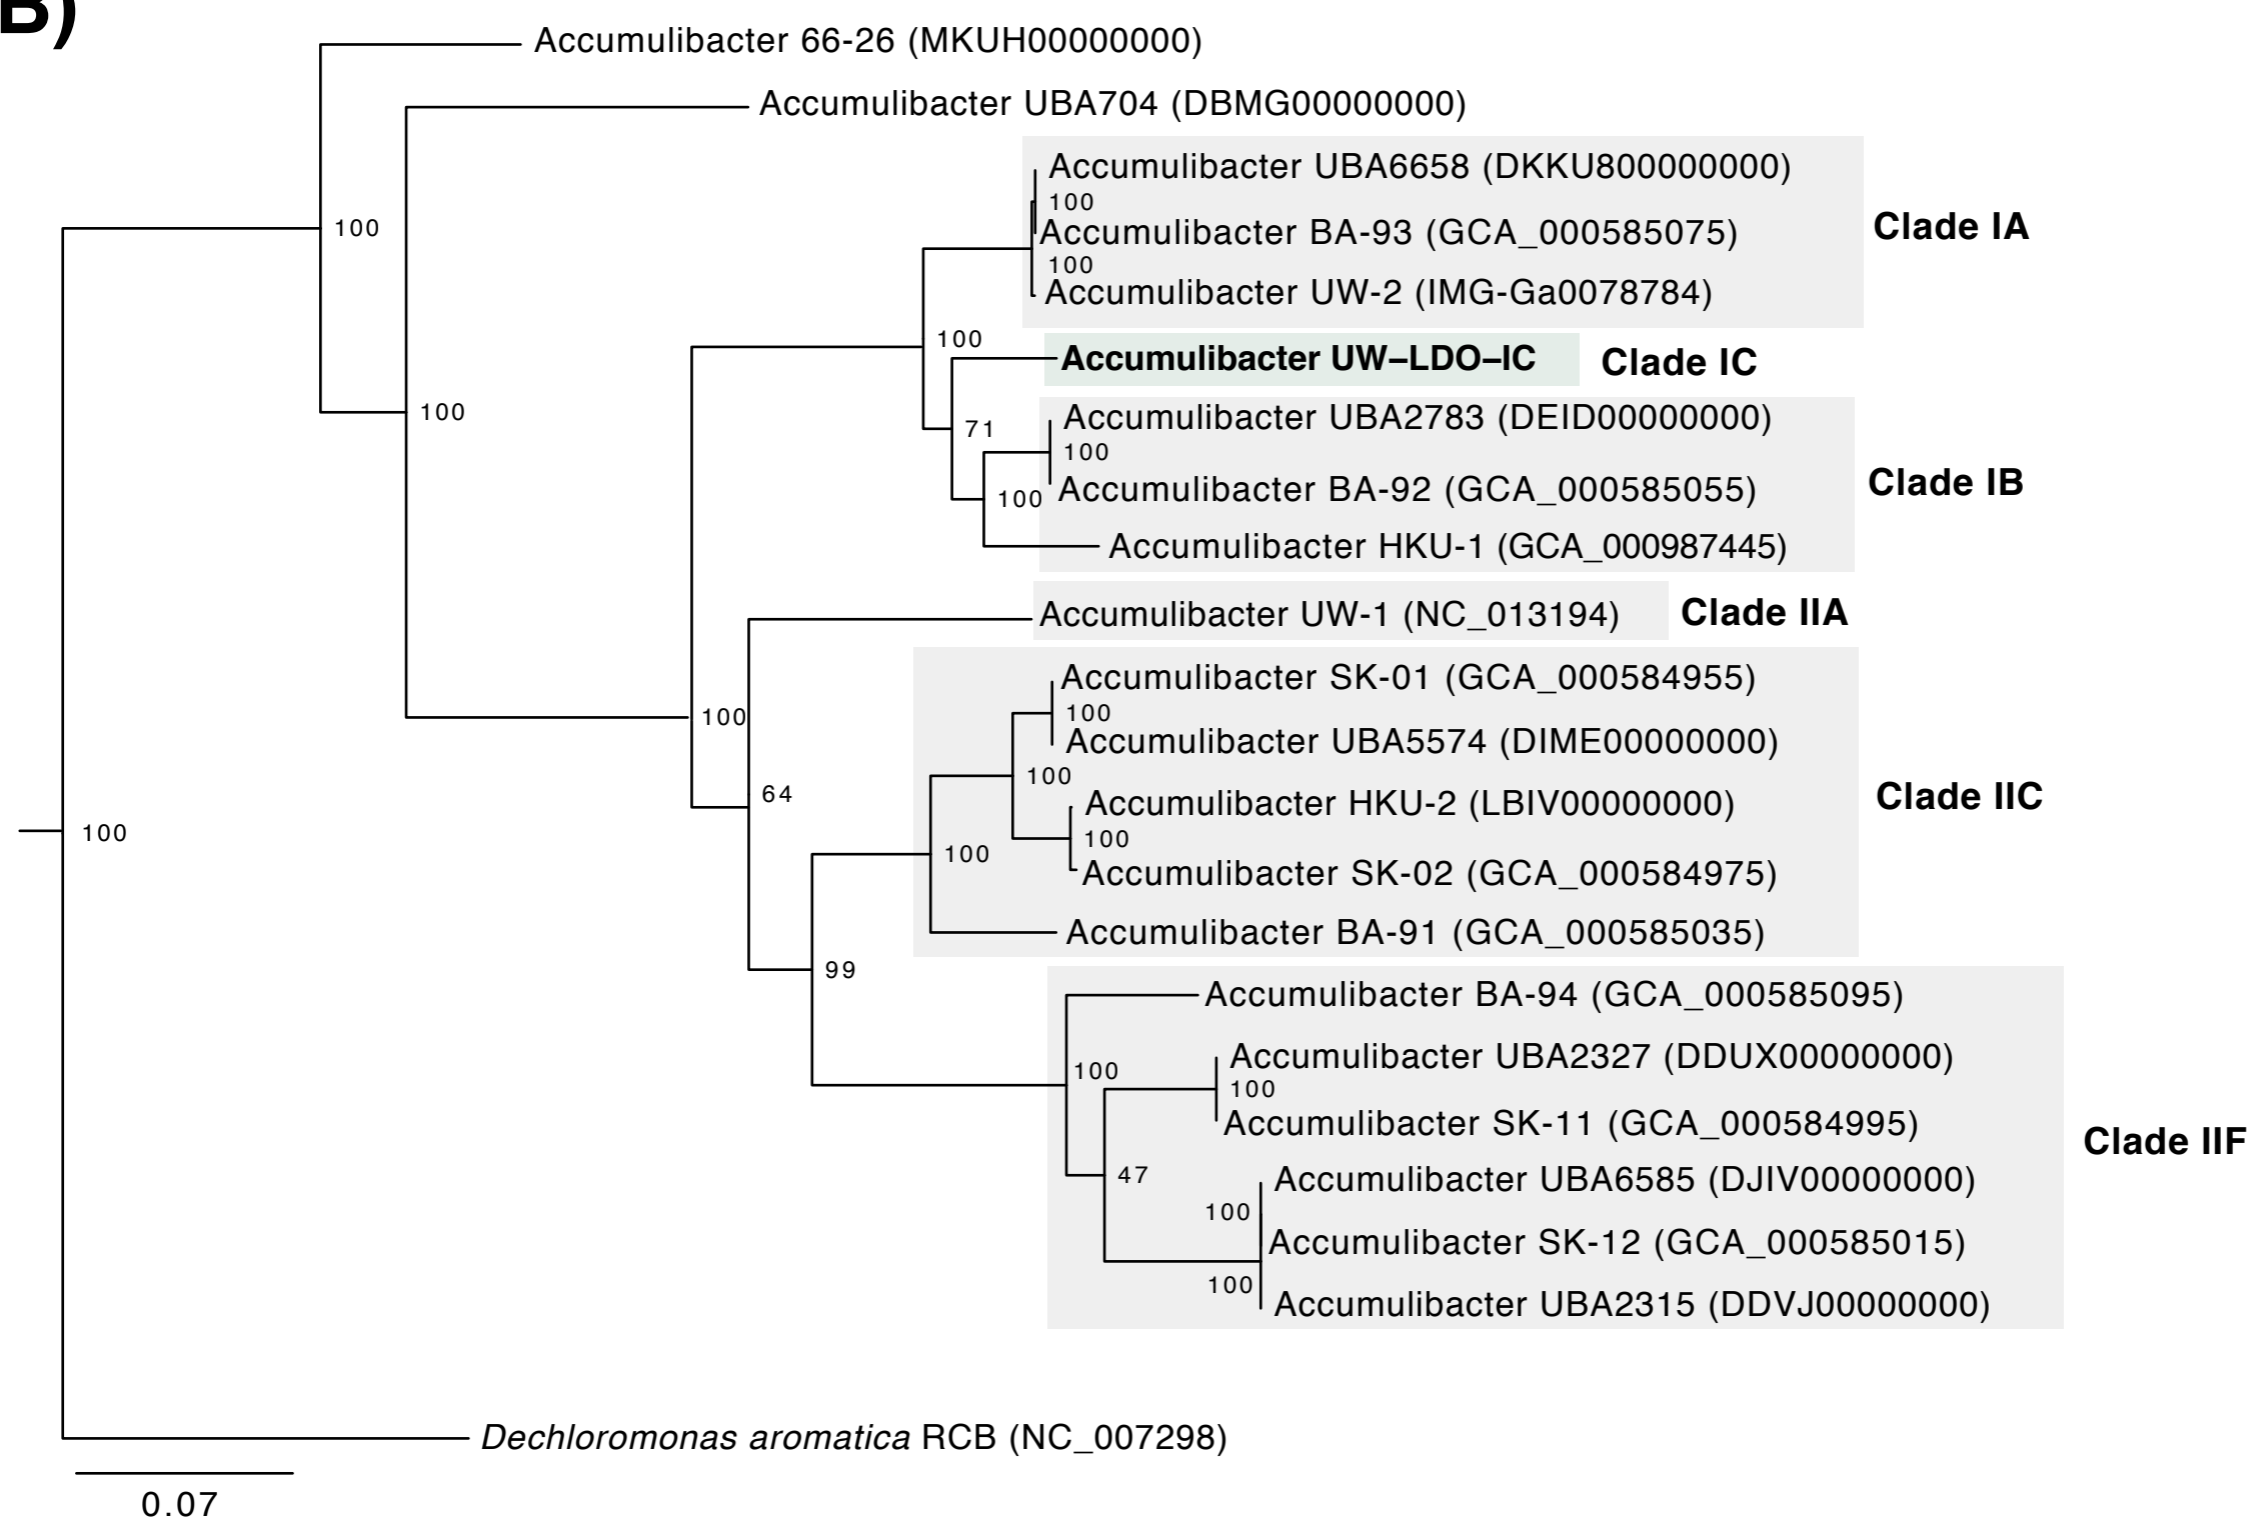

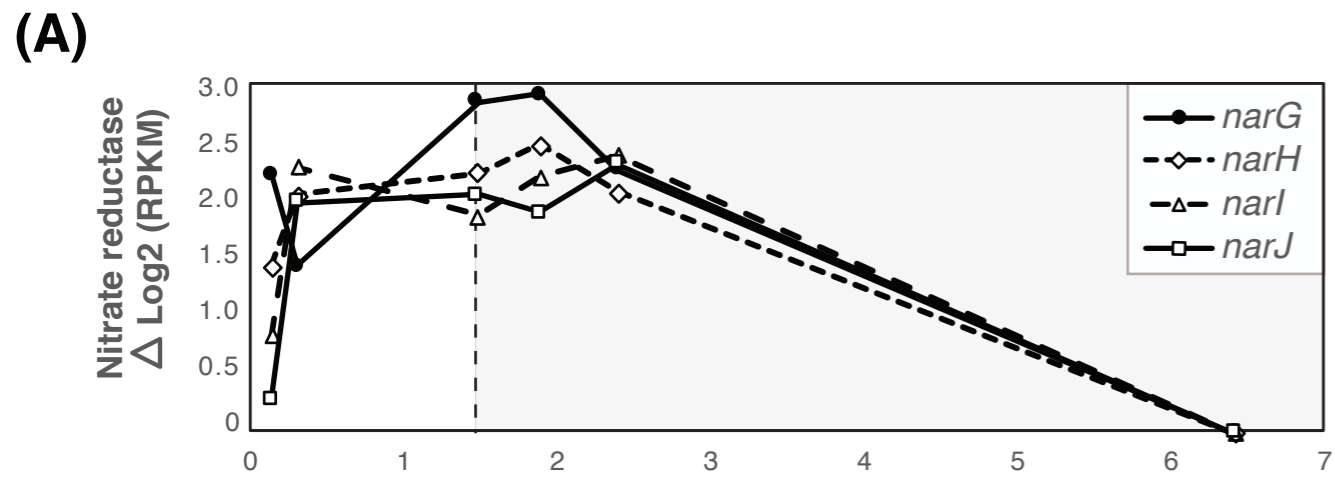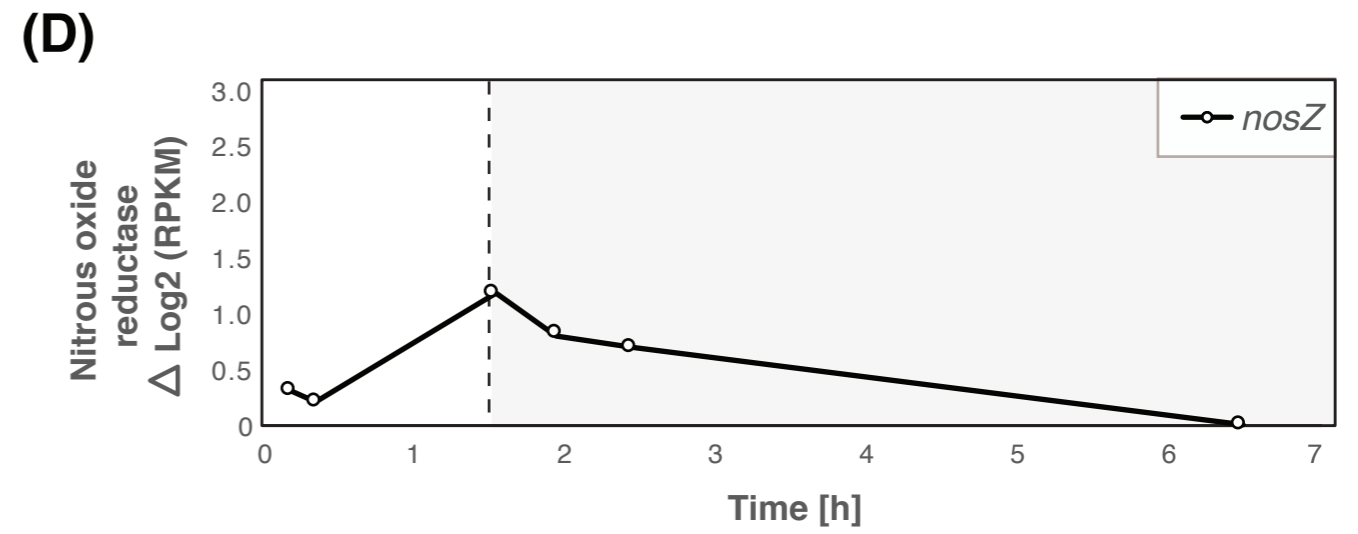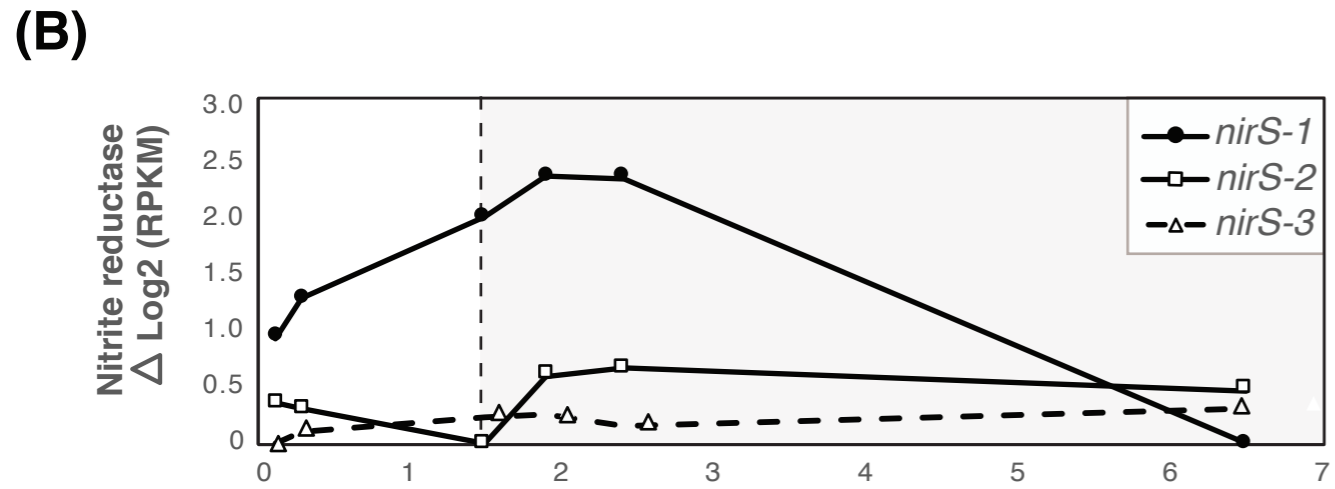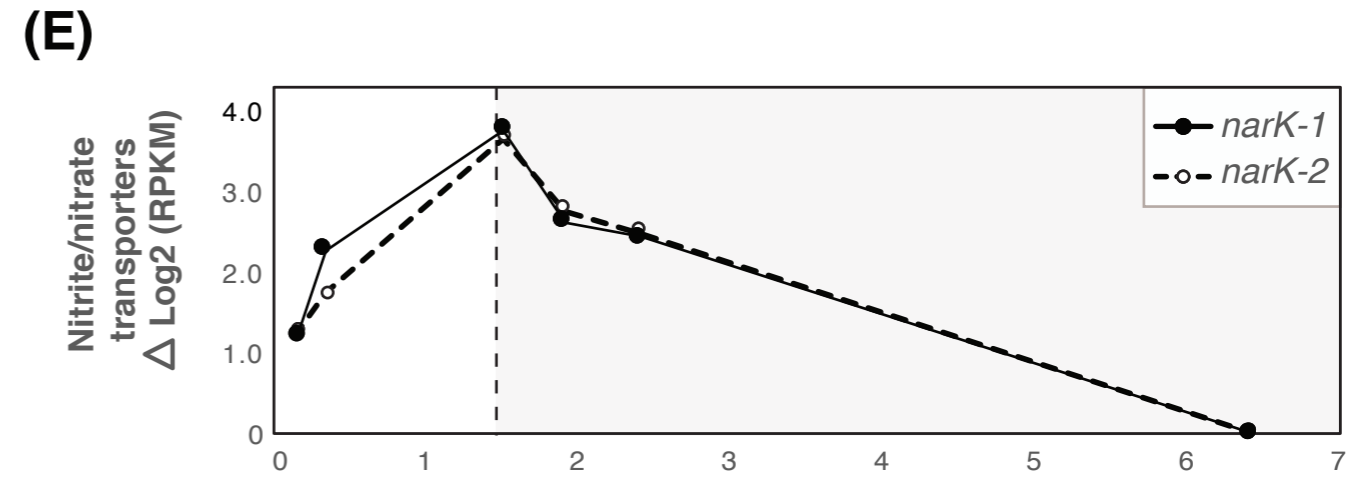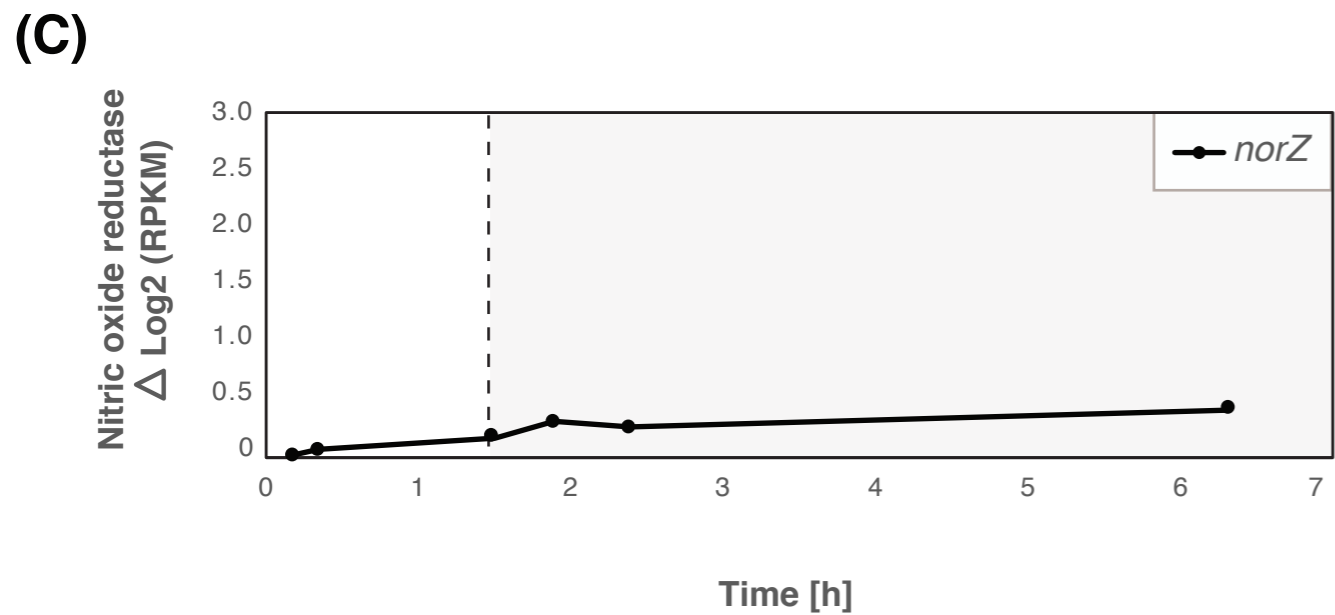



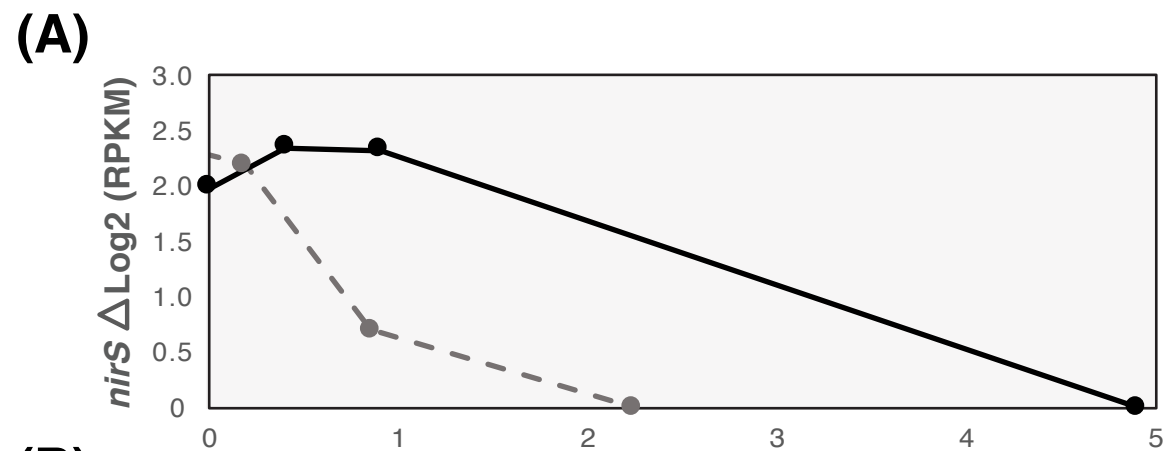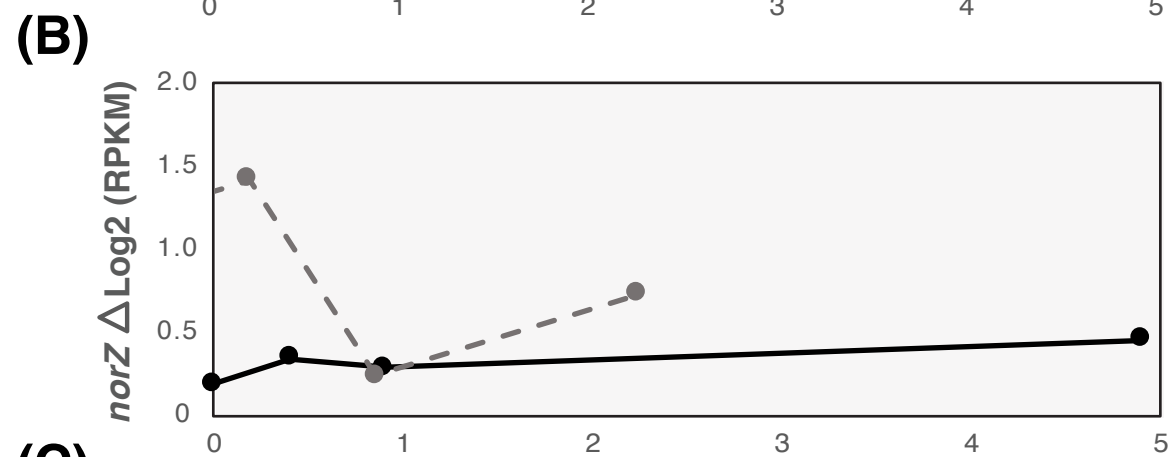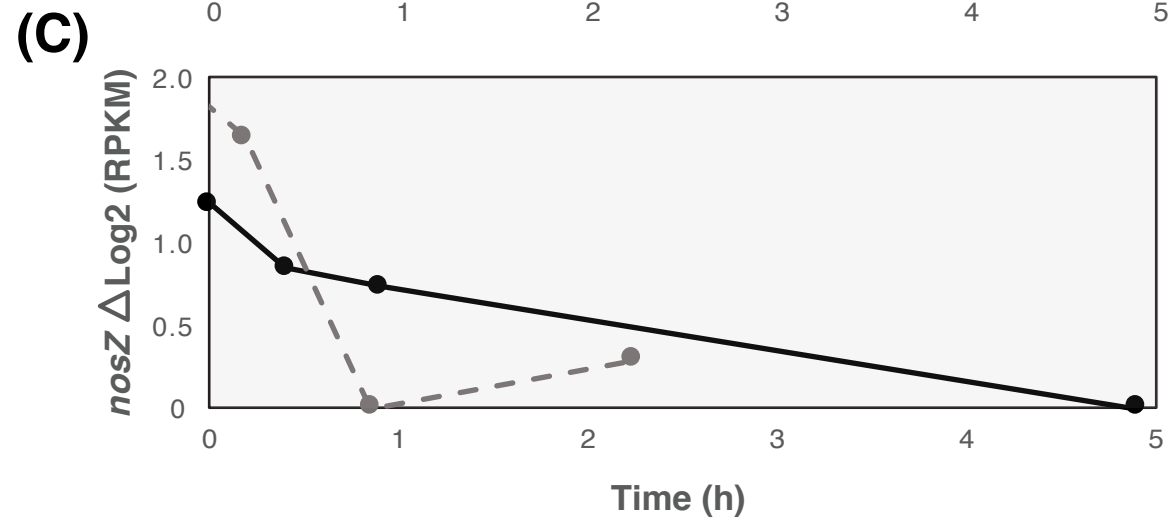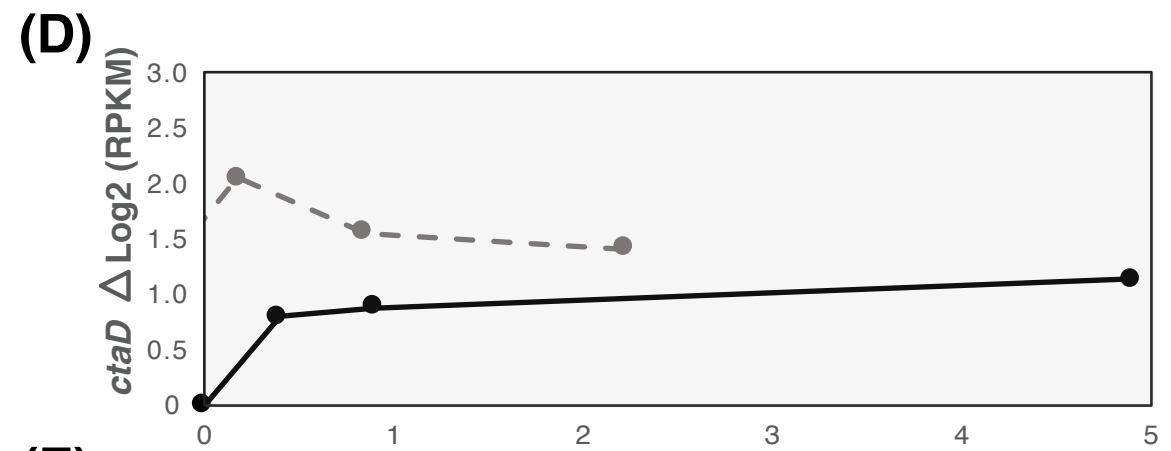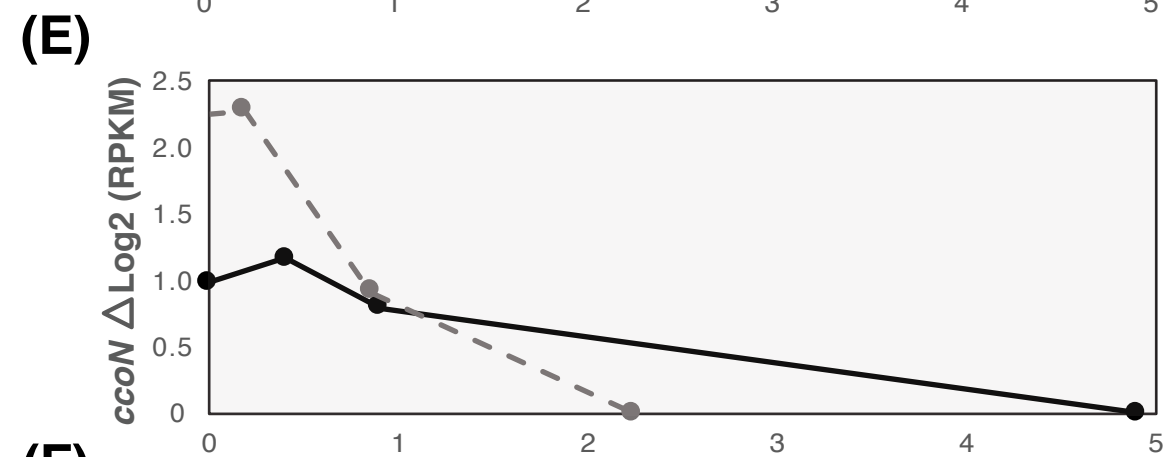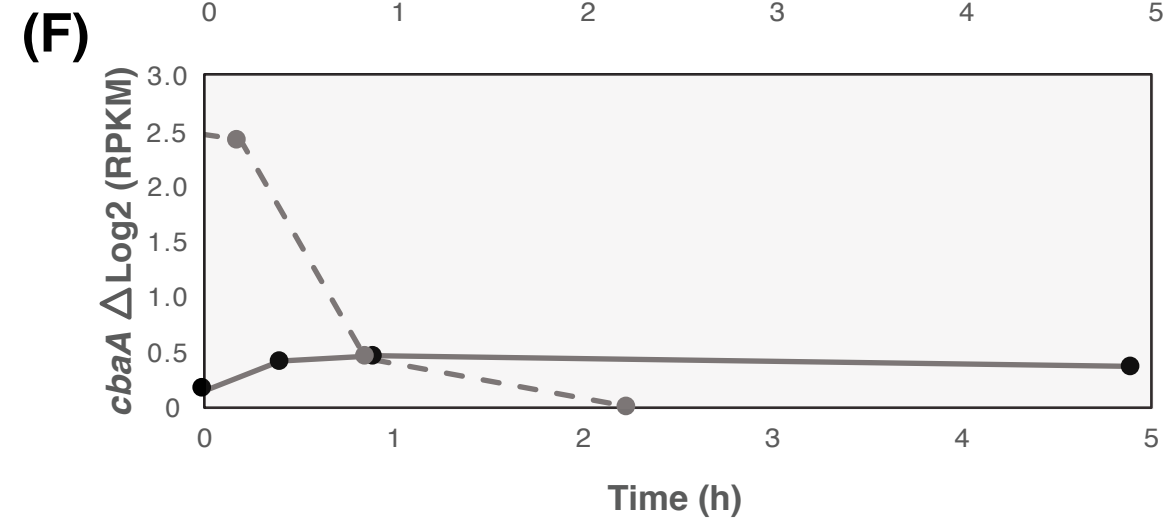

**(A)**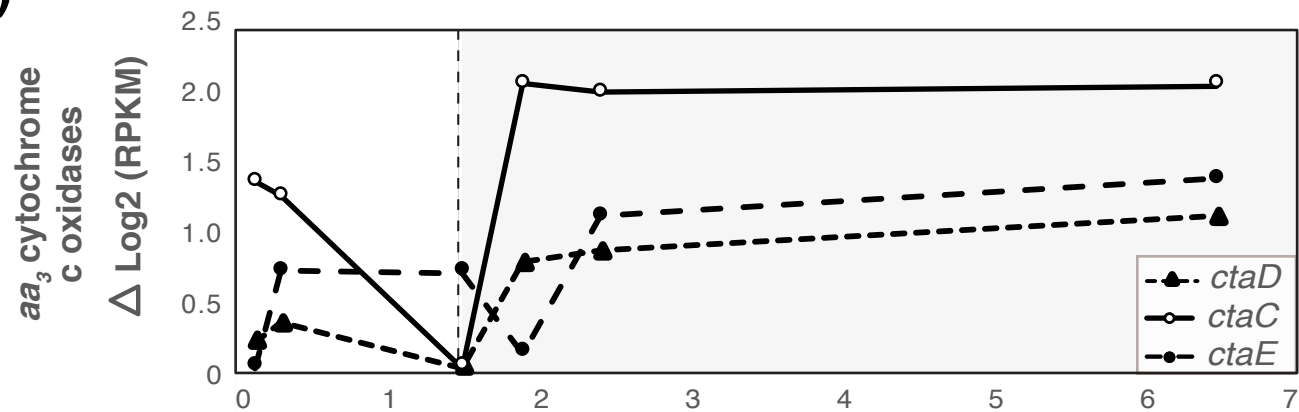**(B)**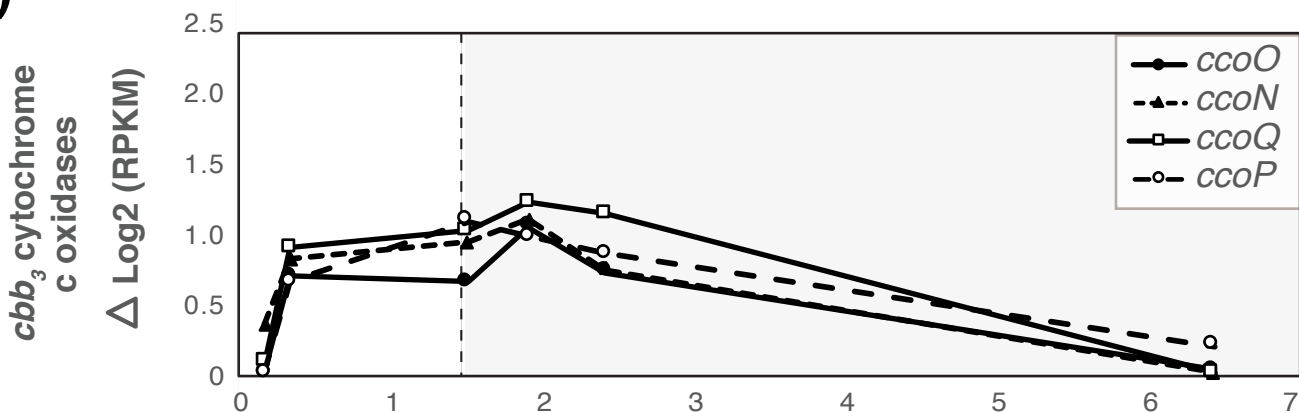**(C)**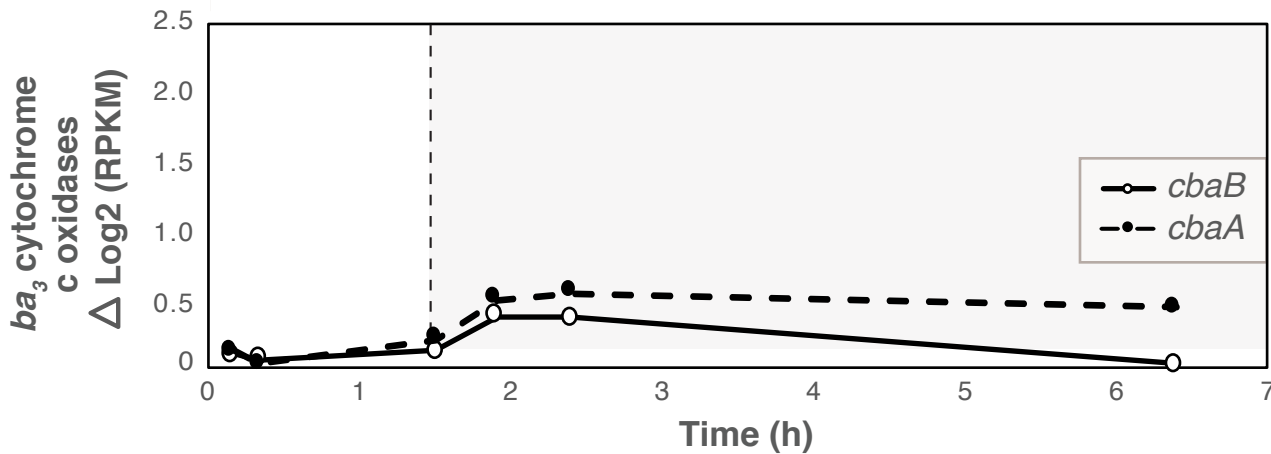

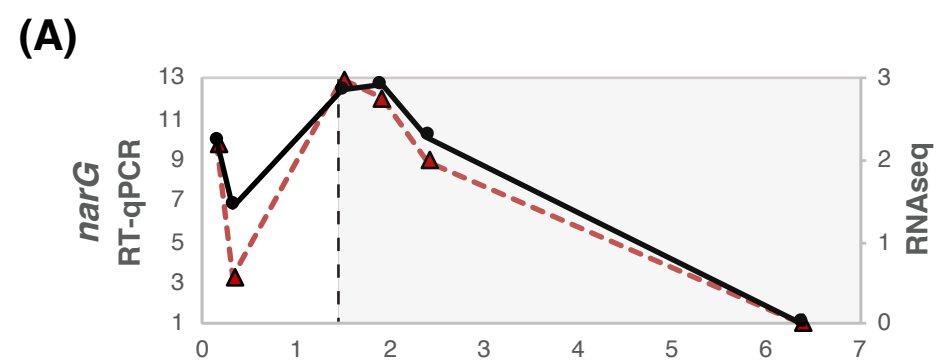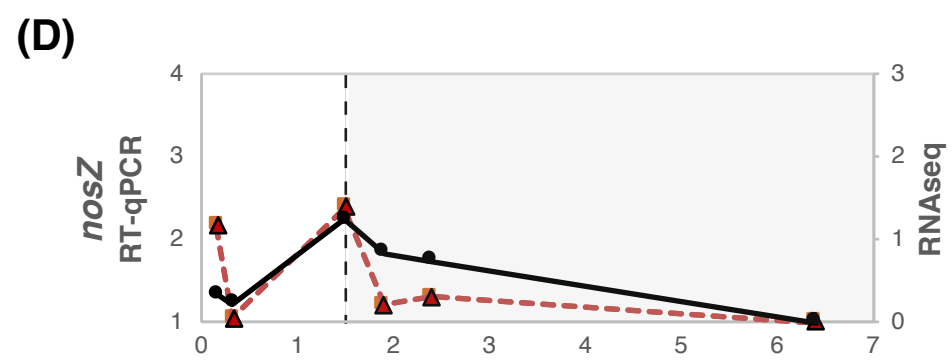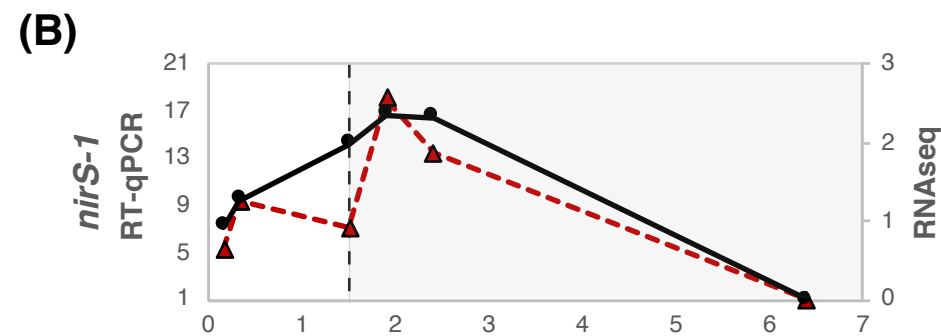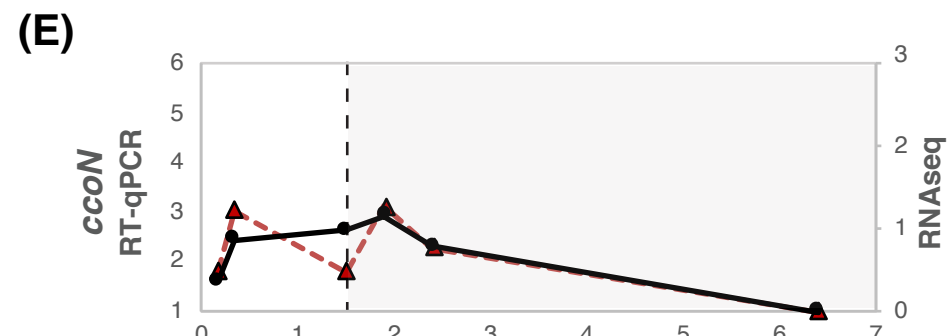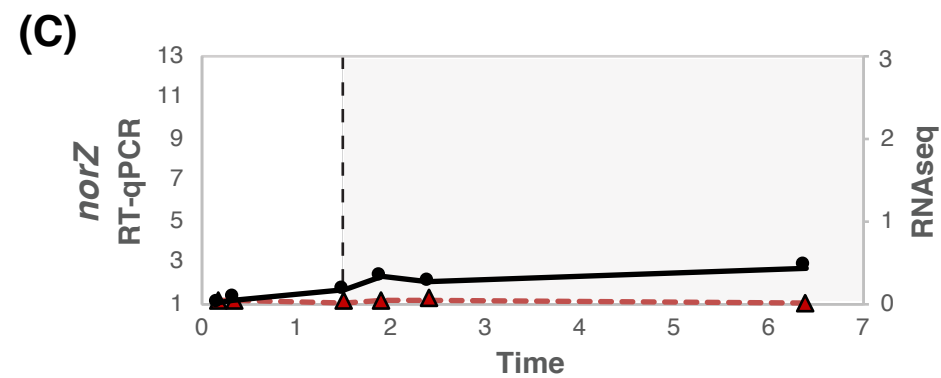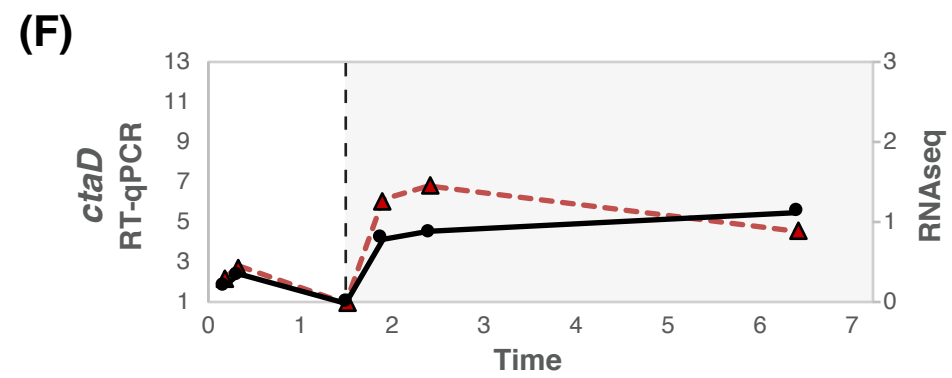

**(A)**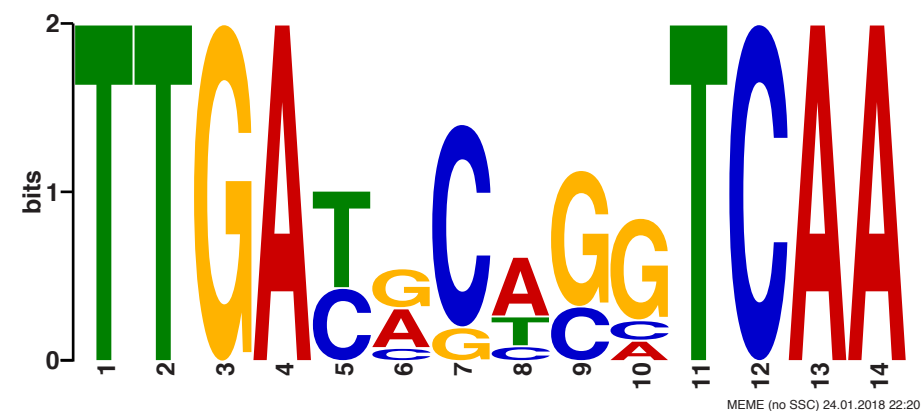**(B)**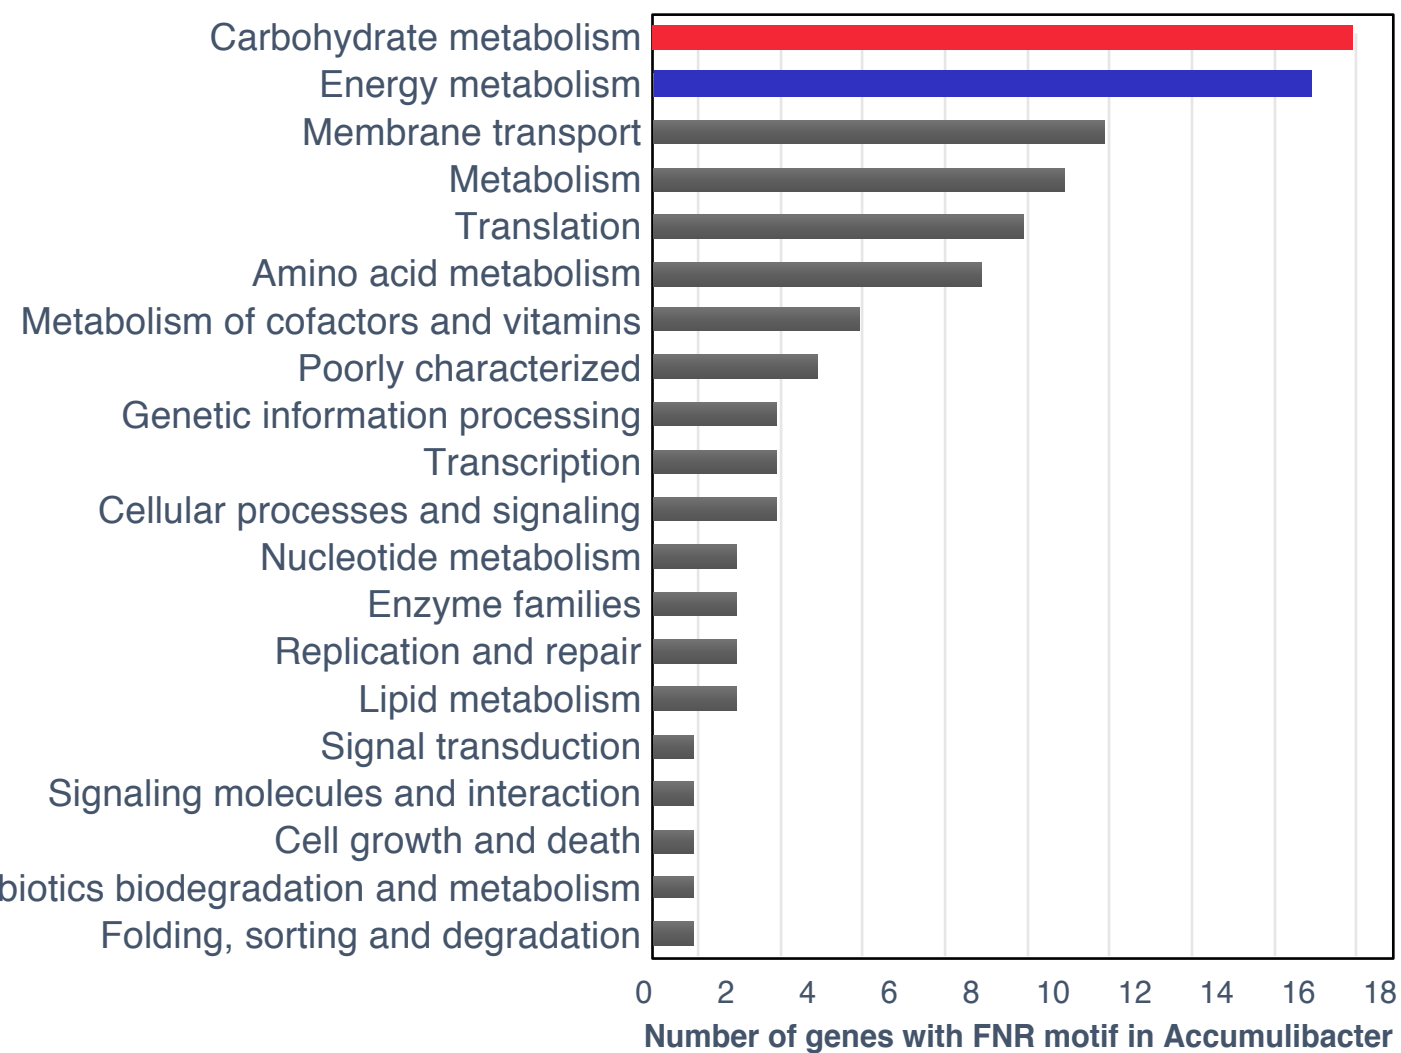**(C)**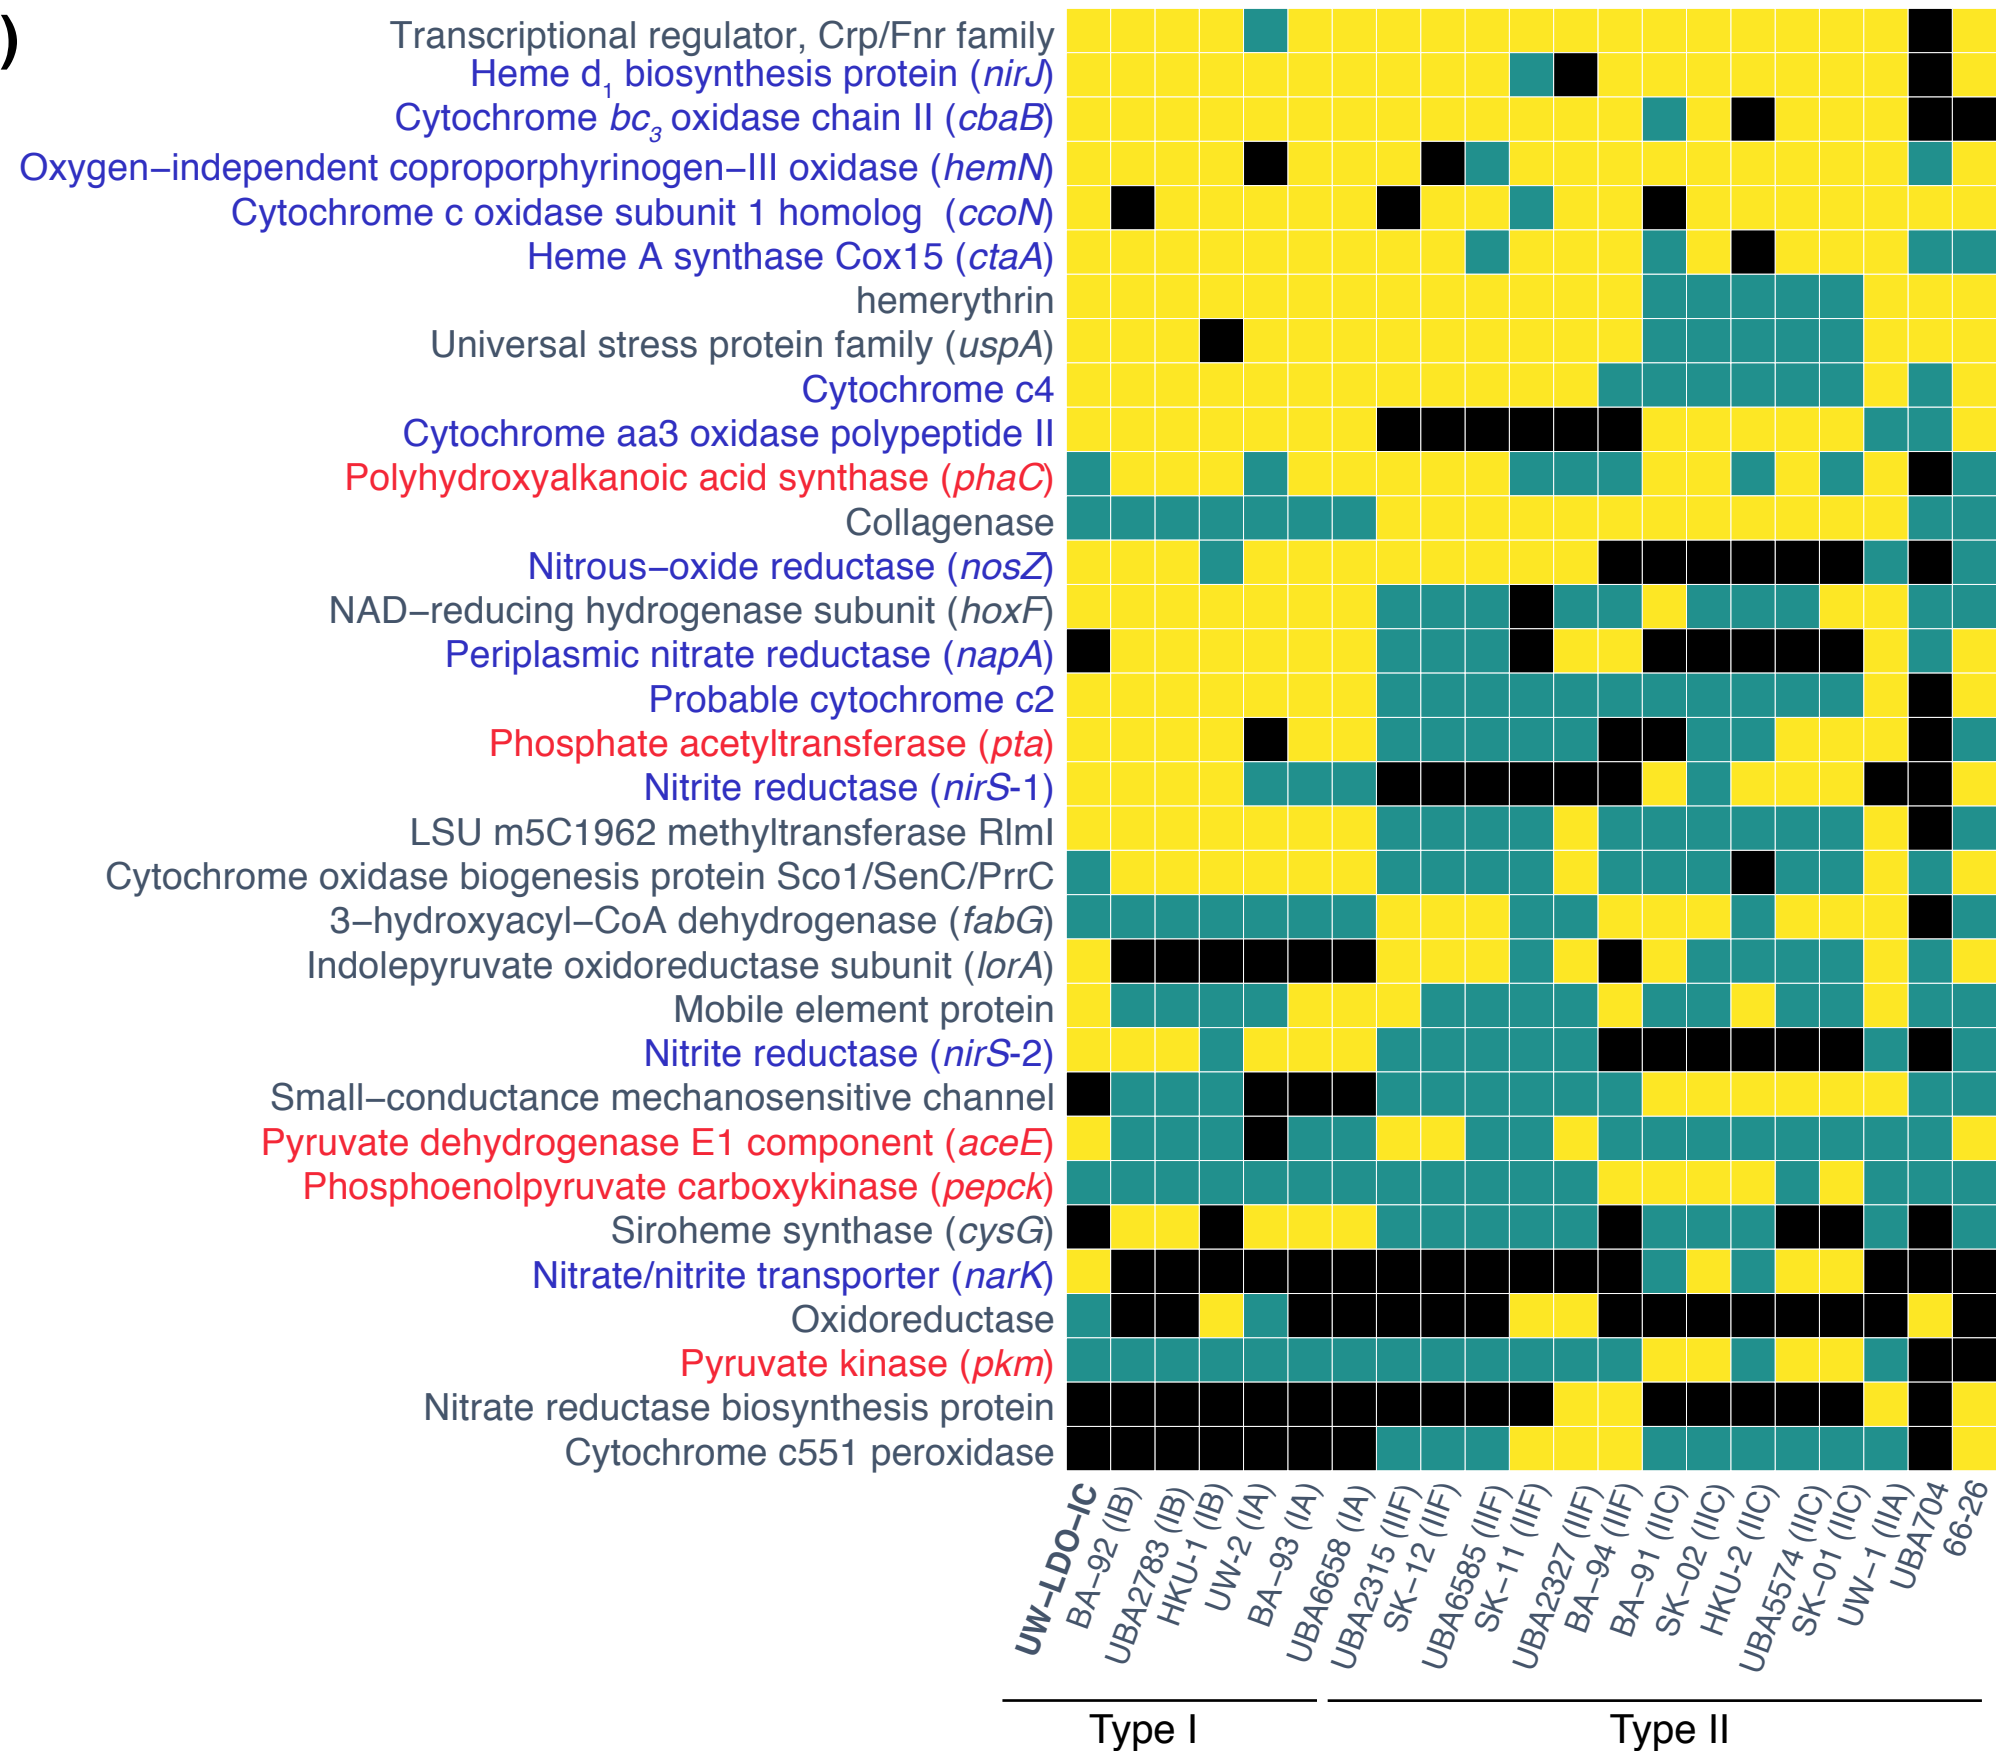

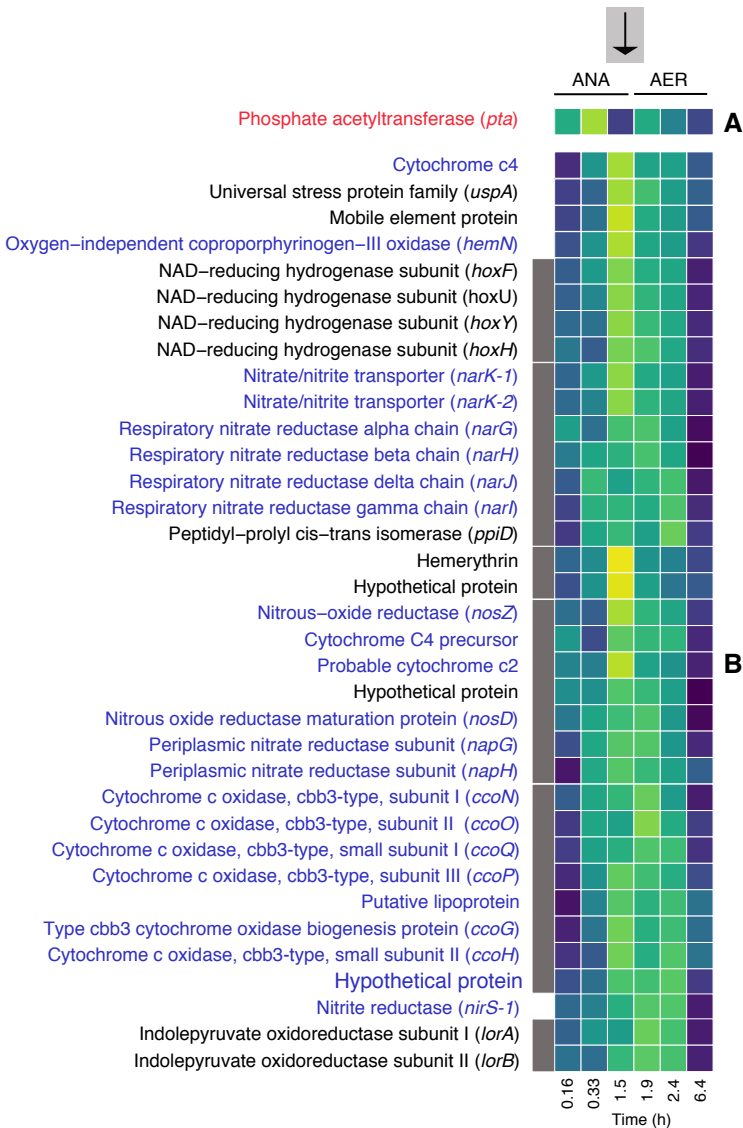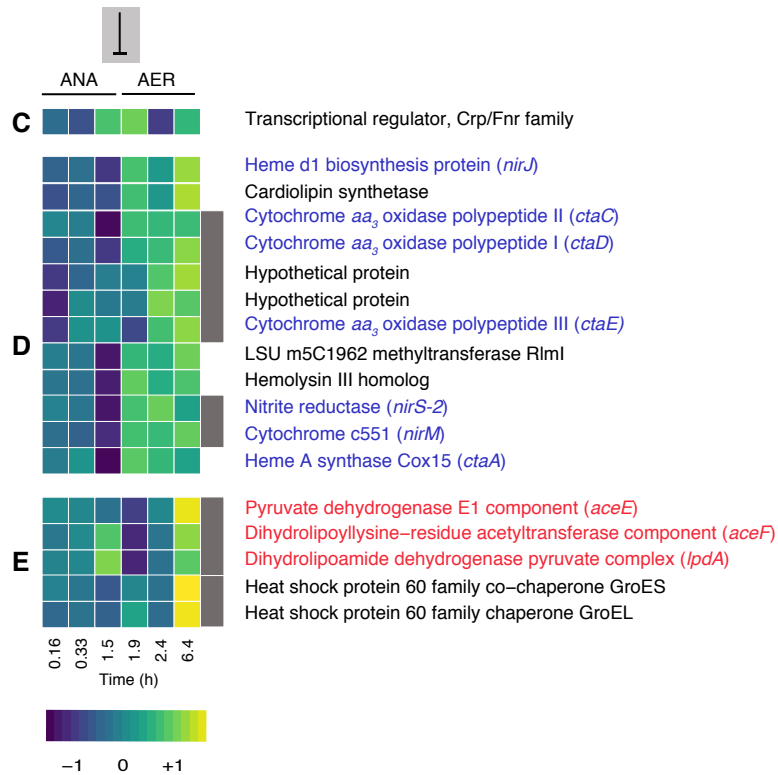

Source: https://www.biorxiv.org/content/10.1101/386516v1.full.pdf
